# Supplementary material
Source: PubMed Central journal article supplement (PMC8011932)
Supplement: NIHMS1668760-supplement-Supplemental_Material.pdf [file NIHMS1668760-supplement-Supplemental_Material.pdf]

## **SUPPLEMENTAL MATERIAL**

### **The aging immune system in acute ischemic stroke: A transcriptomic analysis**

Gina P Sykes BSc, Division of Neurology, Department of Medicine, Faculty of Medicine and Dentistry, University of Alberta, Edmonton, Canada

Joseph Kamtchum-Tatuene MD, Neuroscience and Mental Health Institute, Faculty of Medicine and Dentistry, University of Alberta, Edmonton, Canada

Sarina Falcione BSc, Department of Medical Microbiology and Immunology, Faculty of Medicine and Dentistry, University of Alberta, Edmonton, Canada

Sarah Zehnder BSc, Division of Neurology, Department of Medicine, Faculty of Medicine and Dentistry, University of Alberta, Edmonton, Canada

Danielle Munsterman BSc, Division of Neurology, Department of Medicine, Faculty of Medicine and Dentistry, University of Alberta, Edmonton, Canada

Boryana Stamova PhD, Department of Neurology, University of California, Davis, Sacramento

Bradley P Ander PhD, Department of Neurology, University of California, Davis, Sacramento

Frank R Sharp MD, Department of Neurology, University of California, Davis, Sacramento

Glen Jickling MD, Division of Neurology, Department of Medicine and Neuroscience and Mental Health Institute, Faculty of Medicine and Dentistry, University of Alberta, Edmonton, Canada, and Department of Neurology, University of California, Davis, Sacramento

## Supplemental Methods

### Supplemental Methods

#### Study Participants

Patients presenting with the following criteria were excluded from the study: infection (active or in the preceding 14 days of stroke diagnosis), leukemia, lymphoma, or immunosuppressive therapy. In Cohort 1, 3.9% of patients underwent thrombolysis, and in Cohort 2, 10.6% of patients underwent thrombolysis. Characteristics of Cohort 1 were used to establish age tertile groupings in Cohort 2.<sup>44</sup> Comparisons were made to age-associated genes from two non-stroke aging gene set sources, described further in Methods.

#### Data Processing

Data processing was completed using Partek Genomics Suite (v7.0, St. Louis, MO)<sup>18</sup> and *R* software version 3.6.3.<sup>19</sup> Raw CEL file data were normalized by Robust Multichip Averaging (RMA) and Affymetrix probe sets summarized to the gene level. Analysis of variance (ANOVA) by age was used to select for the probe set with the lowest *P* value of significance where multiple transcripts were found for one gene annotation. Probe sets were annotated to their corresponding Entrez Gene ID and filtered to annotated transcripts present on both the Affymetrix HTA 2.0 and Human Genome U133 Plus 2.0 arrays. Unsupervised clustering in the form of multi-dimensional scaling was used to inspect data variation by cofactors,<sup>20</sup> including but not limited to hypertension, diabetes mellitus, hyperlipidemia, and smoking history; sex and study batch were identified to be included in subsequent modeling. Z-score normalization was used to visualize gene expression in both cohorts.

Graphical Abstract was created with BioRender.com.

## Supplemental Figure

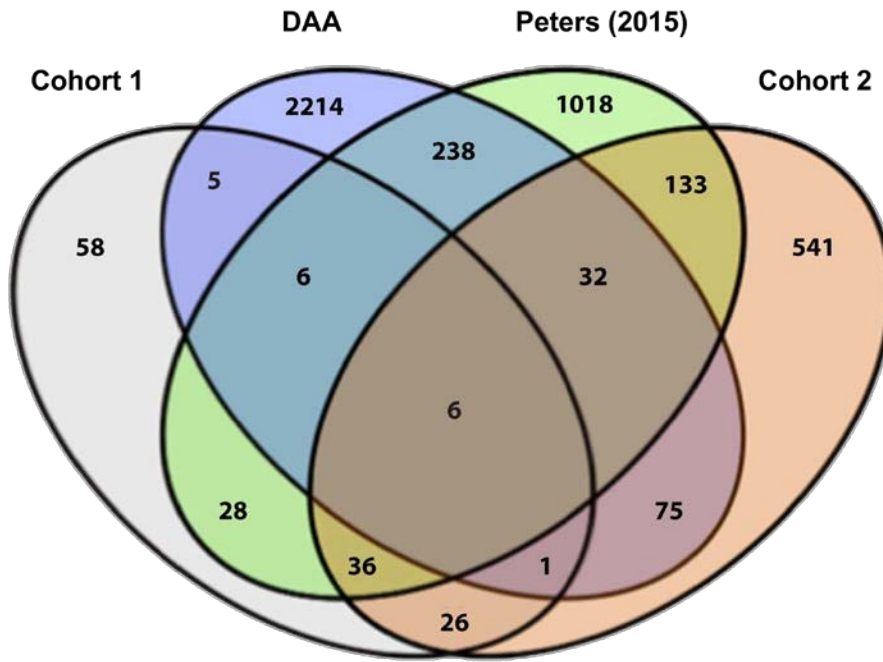

**Figure I. Venn diagram comparing age-associated genes in stroke cohorts and other aging studies.**

Age-associated genes from ischemic stroke Cohort 1 (grey,  $n = 94$ ) and Cohort 2 (orange,  $n = 79$ ) were compared to age-associated genes in non-stroke sources from the DAA study (purple) and the Peters (2015) meta-analysis (green) using Fisher's exact test ( $P < 0.001$ ).

**Table I.** Differentially expressed genes with age in patients with ischemic stroke from Cohort 1**A** Genes that decrease expression with age

| Gene Symbol | Gene Name                                                             | <i>P</i> value<br>(FDR-adjusted) | <i>r</i> (partial correlation<br>coefficient) |
|-------------|-----------------------------------------------------------------------|----------------------------------|-----------------------------------------------|
| NT5E        | 5'-nucleotidase ecto                                                  | 2.44 x 10 <sup>-8</sup>          | -0.55                                         |
| CCR6        | C-C motif chemokine receptor 6                                        | 2.04 x 10 <sup>-7</sup>          | -0.52                                         |
| P2RX5       | purinergic receptor P2X 5                                             | 2.15 x 10 <sup>-6</sup>          | -0.48                                         |
| USP6NL      | USP6 N-terminal like                                                  | 2.34 x 10 <sup>-6</sup>          | -0.48                                         |
| PTPRK       | protein tyrosine phosphatase, receptor type K                         | 2.37 x 10 <sup>-6</sup>          | -0.48                                         |
| CR2         | complement C3d receptor 2                                             | 2.75 x 10 <sup>-6</sup>          | -0.47                                         |
| BTLA        | B and T lymphocyte associated                                         | 3.66 x 10 <sup>-6</sup>          | -0.47                                         |
| RASGRP3     | RAS guanyl releasing protein 3                                        | 3.83 x 10 <sup>-6</sup>          | -0.47                                         |
| NIBAN3      | niban apoptosis regulator 3                                           | 4.49 x 10 <sup>-6</sup>          | -0.47                                         |
| BANK1       | B cell scaffold protein with ankyrin repeats 1                        | 6.27 x 10 <sup>-6</sup>          | -0.46                                         |
| MGAT5       | alpha-1,6-mannosylglycoprotein 6-beta-N-acetylglucosaminyltransferase | 7.32 x 10 <sup>-6</sup>          | -0.46                                         |
| STRBP       | spermatid perinuclear RNA binding protein                             | 7.96 x 10 <sup>-6</sup>          | -0.45                                         |
| NBEA        | neurobeachin                                                          | 8.38 x 10 <sup>-6</sup>          | -0.45                                         |
| BLNK        | B cell linker                                                         | 1.23 x 10 <sup>-5</sup>          | -0.45                                         |
| RAB30       | RAB30, member RAS oncogene family                                     | 1.96 x 10 <sup>-5</sup>          | -0.44                                         |
| COBLL1      | cordons-bleu WH2 repeat protein like 1                                | 2.02 x 10 <sup>-5</sup>          | -0.44                                         |
| RALGPS2     | Ral GEF with PH domain and SH3 binding motif 2                        | 3.21 x 10 <sup>-5</sup>          | -0.43                                         |
| CD79B       | CD79b molecule                                                        | 3.29 x 10 <sup>-5</sup>          | -0.43                                         |
| FCRL1       | Fc receptor like 1                                                    | 3.67 x 10 <sup>-5</sup>          | -0.42                                         |
| KLHL14      | kelch like family member 14                                           | 3.67 x 10 <sup>-5</sup>          | -0.42                                         |
| CDCA7L      | cell division cycle associated 7 like                                 | 4.39 x 10 <sup>-5</sup>          | -0.42                                         |
| RPL22       | ribosomal protein L22                                                 | 4.65 x 10 <sup>-5</sup>          | -0.42                                         |
| SLC9A7      | solute carrier family 9 member A7                                     | 4.95 x 10 <sup>-5</sup>          | -0.42                                         |
| KAT2A       | lysine acetyltransferase 2A                                           | 5.25 x 10 <sup>-5</sup>          | -0.42                                         |
| OSBPL10     | oxysterol binding protein like 10                                     | 5.52 x 10 <sup>-5</sup>          | -0.41                                         |
| PLEKHG1     | pleckstrin homology and RhoGEF domain containing G1                   | 5.54 x 10 <sup>-5</sup>          | -0.41                                         |
| FCRLA       | Fc receptor like A                                                    | 7.05 x 10 <sup>-5</sup>          | -0.41                                         |
| FCRL2       | Fc receptor like 2                                                    | 7.17 x 10 <sup>-5</sup>          | -0.41                                         |
| QRSL1       | glutaminyl-tRNA amidotransferase subunit QRSL1                        | 7.28 x 10 <sup>-5</sup>          | -0.41                                         |
| SPRY1       | sprouty RTK signaling antagonist 1                                    | 7.46 x 10 <sup>-5</sup>          | -0.41                                         |
| ATF7IP2     | activating transcription factor 7 interacting protein 2               | 8.74 x 10 <sup>-5</sup>          | -0.40                                         |
| CXCR5       | C-X-C motif chemokine receptor 5                                      | 9.97 x 10 <sup>-5</sup>          | -0.40                                         |
| B3GALT2     | beta-1,3-galactosyltransferase 2                                      | 1.02 x 10 <sup>-4</sup>          | -0.40                                         |

| Gene Symbol | Gene Name                                                               | <i>P</i> value<br>(FDR-adjusted) | <i>r</i> (partial correlation<br>coefficient) |
|-------------|-------------------------------------------------------------------------|----------------------------------|-----------------------------------------------|
| PAX5        | paired box 5                                                            | 1.12 x 10 <sup>-4</sup>          | -0.40                                         |
| SPIB        | Spi-B transcription factor                                              | 1.14 x 10 <sup>-4</sup>          | -0.40                                         |
| TPD52       | tumor protein D52                                                       | 1.28 x 10 <sup>-4</sup>          | -0.40                                         |
| ABLIM1      | actin binding LIM protein 1                                             | 1.32 x 10 <sup>-4</sup>          | -0.39                                         |
| KHDRBS2     | KH RNA binding domain containing, signal transduction associated 2      | 1.42 x 10 <sup>-4</sup>          | -0.39                                         |
| ID3         | inhibitor of DNA binding 3, HLH protein                                 | 1.48 x 10 <sup>-4</sup>          | -0.39                                         |
| SESN1       | sestrin 1                                                               | 1.54 x 10 <sup>-4</sup>          | -0.39                                         |
| CCR7        | C-C motif chemokine receptor 7                                          | 1.62 x 10 <sup>-4</sup>          | -0.39                                         |
| ADAM28      | ADAM metallopeptidase domain 28                                         | 1.66 x 10 <sup>-4</sup>          | -0.39                                         |
| LDHB        | lactate dehydrogenase B                                                 | 1.71 x 10 <sup>-4</sup>          | -0.39                                         |
| AGMAT       | agmatinase                                                              | 1.81 x 10 <sup>-4</sup>          | -0.39                                         |
| NELL2       | neural EGFL like 2                                                      | 1.81 x 10 <sup>-4</sup>          | -0.39                                         |
| FCER2       | Fc fragment of IgE receptor II                                          | 1.84 x 10 <sup>-4</sup>          | -0.39                                         |
| LEF1-AS1    | LEF1 antisense RNA 1                                                    | 1.86 x 10 <sup>-4</sup>          | -0.39                                         |
| CD27        | CD27 molecule                                                           | 1.87 x 10 <sup>-4</sup>          | -0.39                                         |
| GPR183      | G protein-coupled receptor 183                                          | 1.93 x 10 <sup>-4</sup>          | -0.39                                         |
| BCL7A       | BAF chromatin remodeling complex subunit BCL7A                          | 1.97 x 10 <sup>-4</sup>          | -0.39                                         |
| CAMK4       | calcium/calmodulin dependent protein kinase IV                          | 2.45 x 10 <sup>-4</sup>          | -0.38                                         |
| IFT57       | intraflagellar transport 57                                             | 2.56 x 10 <sup>-4</sup>          | -0.38                                         |
| TCL6        | T cell leukemia/lymphoma 6                                              | 2.70 x 10 <sup>-4</sup>          | -0.38                                         |
| BCL11A      | BAF chromatin remodeling complex subunit BCL11A                         | 2.76 x 10 <sup>-4</sup>          | -0.38                                         |
| SEL1L3      | SEL1L family member 3                                                   | 2.91 x 10 <sup>-4</sup>          | -0.38                                         |
| PIK3C2B     | phosphatidylinositol-4-phosphate 3-kinase catalytic subunit type 2 beta | 3.18 x 10 <sup>-4</sup>          | -0.37                                         |
| VPREB3      | V-set pre-B cell surrogate light chain 3                                | 3.19 x 10 <sup>-4</sup>          | -0.37                                         |
| POU2AF1     | POU class 2 associating factor 1                                        | 3.34 x 10 <sup>-4</sup>          | -0.37                                         |
| ITPR1       | inositol 1,4,5-trisphosphate receptor type 1                            | 3.41 x 10 <sup>-4</sup>          | -0.37                                         |
| SHISAL2A    | shisa like 2A                                                           | 3.43 x 10 <sup>-4</sup>          | -0.37                                         |
| ZCCHC7      | zinc finger CCHC-type containing 7                                      | 3.70 x 10 <sup>-4</sup>          | -0.37                                         |
| TMEM156     | transmembrane protein 156                                               | 3.98 x 10 <sup>-4</sup>          | -0.37                                         |
| EPHA4       | EPH receptor A4                                                         | 4.14 x 10 <sup>-4</sup>          | -0.37                                         |
| CMSS1       | cms1 ribosomal small subunit homolog                                    | 4.32 x 10 <sup>-4</sup>          | -0.37                                         |
| TMEM204     | transmembrane protein 204                                               | 4.95 x 10 <sup>-4</sup>          | -0.36                                         |
| PLPP5       | phospholipid phosphatase 5                                              | 5.05 x 10 <sup>-4</sup>          | -0.36                                         |
| IGHM        | immunoglobulin heavy constant mu                                        | 5.17 x 10 <sup>-4</sup>          | -0.36                                         |
| KIF5C       | kinesin family member 5C                                                | 5.18 x 10 <sup>-4</sup>          | -0.36                                         |
| LRRN3       | leucine rich repeat neuronal 3                                          | 8.40 x 10 <sup>-8</sup>          | -0.53                                         |
| COL19A1     | collagen type XIX alpha 1 chain                                         | 1.88 x 10 <sup>-6</sup>          | -0.48                                         |
| AFF3        | AF4/FMR2 family member 3                                                | 2.66 x 10 <sup>-6</sup>          | -0.47                                         |

| Gene Symbol  | Gene Name                                              | <i>P</i> value<br>(FDR-adjusted) | <i>r</i> (partial correlation<br>coefficient) |
|--------------|--------------------------------------------------------|----------------------------------|-----------------------------------------------|
| LINC00926    | long intergenic non-protein coding RNA 926             | 5.77 x 10 <sup>-6</sup>          | -0.46                                         |
| CCDC50       | coiled-coil domain containing 50                       | 7.61 x 10 <sup>-6</sup>          | -0.46                                         |
| HLA-DOA      | major histocompatibility complex, class II, DO alpha   | 7.75 x 10 <sup>-6</sup>          | -0.45                                         |
| BLK          | BLK proto-oncogene, Src family tyrosine kinase         | 7.94 x 10 <sup>-6</sup>          | -0.45                                         |
| PAWR         | pro-apoptotic WT1 regulator                            | 8.36 x 10 <sup>-6</sup>          | -0.45                                         |
| MS4A1        | membrane spanning 4-domains A1                         | 1.14 x 10 <sup>-5</sup>          | -0.45                                         |
| LINC01857    | long intergenic non-protein coding RNA 1857            | 1.22 x 10 <sup>-5</sup>          | -0.45                                         |
| E2F5         | E2F transcription factor 5                             | 1.24 x 10 <sup>-5</sup>          | -0.45                                         |
| C1orf220     | chromosome 1 open reading frame 220 (putative)         | 1.30 x 10 <sup>-5</sup>          | -0.44                                         |
| KCNH8        | potassium voltage-gated channel subfamily H member 8   | 1.38 x 10 <sup>-5</sup>          | -0.44                                         |
| UGT8         | UDP glycosyltransferase 8                              | 1.44 x 10 <sup>-5</sup>          | -0.44                                         |
| ZNF382       | zinc finger protein 382                                | 4.13 x 10 <sup>-5</sup>          | -0.42                                         |
| NBEAP1       | neurobeachin pseudogene 1                              | 4.51 x 10 <sup>-5</sup>          | -0.42                                         |
| CD72         | CD72 molecule                                          | 5.21 x 10 <sup>-5</sup>          | -0.42                                         |
| ADK          | adenosine kinase                                       | 5.43 x 10 <sup>-5</sup>          | -0.41                                         |
| IL23R        | interleukin 23 receptor                                | 5.51 x 10 <sup>-5</sup>          | -0.41                                         |
| ABCB4        | ATP binding cassette subfamily B member 4              | 6.02 x 10 <sup>-5</sup>          | -0.41                                         |
| UBE2D2       | ubiquitin conjugating enzyme E2 D2                     | 6.37 x 10 <sup>-5</sup>          | -0.41                                         |
| GRAPL        | GRB2 related adaptor protein like                      | 6.51 x 10 <sup>-5</sup>          | -0.41                                         |
| HLA-DOB      | major histocompatibility complex, class II, DO beta    | 6.70 x 10 <sup>-5</sup>          | -0.41                                         |
| CD22         | CD22 molecule                                          | 7.70 x 10 <sup>-5</sup>          | -0.41                                         |
| EBF1         | EBF transcription factor 1                             | 7.75 x 10 <sup>-5</sup>          | -0.41                                         |
| ZNF542P      | zinc finger protein 542, pseudogene                    | 8.35 x 10 <sup>-5</sup>          | -0.41                                         |
| STAP1        | signal transducing adaptor family member 1             | 9.45 x 10 <sup>-5</sup>          | -0.40                                         |
| ZIK1         | zinc finger protein interacting with K protein 1       | 9.95 x 10 <sup>-5</sup>          | -0.40                                         |
| SLC4A10      | solute carrier family 4 member 10                      | 1.04 x 10 <sup>-4</sup>          | -0.40                                         |
| C11orf1      | chromosome 11 open reading frame 1                     | 1.10 x 10 <sup>-4</sup>          | -0.40                                         |
| C12orf42     | chromosome 12 open reading frame 42                    | 1.13 x 10 <sup>-4</sup>          | -0.40                                         |
| LOC283194    | uncharacterized LOC283194                              | 1.13 x 10 <sup>-4</sup>          | -0.40                                         |
| CNST         | consortin, connexin sorting protein                    | 1.18 x 10 <sup>-4</sup>          | -0.40                                         |
| MAP9         | microtubule associated protein 9                       | 1.30 x 10 <sup>-4</sup>          | -0.40                                         |
| LOC101928140 | uncharacterized LOC101928140                           | 1.31 x 10 <sup>-4</sup>          | -0.39                                         |
| TSPAN13      | tetraspanin 13                                         | 1.35 x 10 <sup>-4</sup>          | -0.39                                         |
| TEX9         | testis expressed 9                                     | 1.41 x 10 <sup>-4</sup>          | -0.39                                         |
| SYPL1        | synaptophysin like 1                                   | 1.46 x 10 <sup>-4</sup>          | -0.39                                         |
| TAF4B        | TATA-box binding protein associated factor 4b          | 1.51 x 10 <sup>-4</sup>          | -0.39                                         |
| LINC00954    | long intergenic non-protein coding RNA 954             | 1.62 x 10 <sup>-4</sup>          | -0.39                                         |
| EBLN3P       | endogenous Bornavirus-like nucleoprotein 3, pseudogene | 1.64 x 10 <sup>-4</sup>          | -0.39                                         |

| Gene Symbol | Gene Name                                                | <i>P</i> value<br>(FDR-adjusted) | <i>r</i> (partial correlation<br>coefficient) |
|-------------|----------------------------------------------------------|----------------------------------|-----------------------------------------------|
| LINC00667   | long intergenic non-protein coding RNA 667               | 1.64 x 10 <sup>-4</sup>          | -0.39                                         |
| CHI3L2      | chitinase 3 like 2                                       | 1.70 x 10 <sup>-4</sup>          | -0.39                                         |
| PDE7A       | phosphodiesterase 7A                                     | 1.77 x 10 <sup>-4</sup>          | -0.39                                         |
| CD79A       | CD79a molecule                                           | 2.12 x 10 <sup>-4</sup>          | -0.38                                         |
| RIMKLB      | ribosomal modification protein rimK like family member B | 2.35 x 10 <sup>-4</sup>          | -0.38                                         |
| SNHG8       | small nucleolar RNA host gene 8                          | 2.53 x 10 <sup>-4</sup>          | -0.38                                         |
| ZNF518B     | zinc finger protein 518B                                 | 2.57 x 10 <sup>-4</sup>          | -0.38                                         |
| PM20D2      | peptidase M20 domain containing 2                        | 2.59 x 10 <sup>-4</sup>          | -0.38                                         |
| NOG         | noggin                                                   | 2.92 x 10 <sup>-4</sup>          | -0.38                                         |
| DPH5        | diphthamide biosynthesis 5                               | 3.01 x 10 <sup>-4</sup>          | -0.37                                         |
| LTB         | lymphotoxin beta                                         | 3.02 x 10 <sup>-4</sup>          | -0.37                                         |
| YME1L1      | YME1 like 1 ATPase                                       | 3.06 x 10 <sup>-4</sup>          | -0.37                                         |
| DNAJC15     | DnaJ heat shock protein family (Hsp40) member C15        | 3.24 x 10 <sup>-4</sup>          | -0.37                                         |
| DUSP16      | dual specificity phosphatase 16                          | 3.28 x 10 <sup>-4</sup>          | -0.37                                         |
| RPL18       | ribosomal protein L18                                    | 3.31 x 10 <sup>-4</sup>          | -0.37                                         |
| SAV1        | salvador family WW domain containing protein 1           | 3.35 x 10 <sup>-4</sup>          | -0.37                                         |
| ZDBF2       | zinc finger DBF-type containing 2                        | 3.43 x 10 <sup>-4</sup>          | -0.37                                         |
| SIPA1L3     | signal induced proliferation associated 1 like 3         | 3.52 x 10 <sup>-4</sup>          | -0.37                                         |
| ZSCAN23     | zinc finger and SCAN domain containing 23                | 3.61 x 10 <sup>-4</sup>          | -0.37                                         |
| ZNF107      | zinc finger protein 107                                  | 3.88 x 10 <sup>-4</sup>          | -0.37                                         |
| AGPAT5      | 1-acylglycerol-3-phosphate O-acyltransferase 5           | 3.97 x 10 <sup>-4</sup>          | -0.37                                         |
| CNKSR2      | connector enhancer of kinase suppressor of Ras 2         | 4.05 x 10 <sup>-4</sup>          | -0.37                                         |
| OCIAD2      | OCIA domain containing 2                                 | 4.15 x 10 <sup>-4</sup>          | -0.37                                         |
| RPS12       | ribosomal protein S12                                    | 4.32 x 10 <sup>-4</sup>          | -0.37                                         |
| BIRC3       | baculoviral IAP repeat containing 3                      | 4.48 x 10 <sup>-4</sup>          | -0.36                                         |
| RAD54B      | RAD54 homolog B                                          | 4.71 x 10 <sup>-4</sup>          | -0.36                                         |
| CHMP7       | charged multivesicular body protein 7                    | 4.74 x 10 <sup>-4</sup>          | -0.36                                         |
| CCNB1IP1    | cyclin B1 interacting protein 1                          | 4.92 x 10 <sup>-4</sup>          | -0.36                                         |

**B Genes that increase expression with age**

| Gene Symbol | Gene Name                                                 | P value (FDR < 0.05)    | r (partial correlation coefficient) |
|-------------|-----------------------------------------------------------|-------------------------|-------------------------------------|
| CD96        | CD96 molecule                                             | 1.94 x 10 <sup>-5</sup> | 0.44                                |
| PDLIM5      | PDZ and LIM domain 5                                      | 4.74 x 10 <sup>-4</sup> | 0.36                                |
| RGS3        | regulator of G protein signaling 3                        | 3.71 x 10 <sup>-5</sup> | 0.42                                |
| CYYR1       | cysteine and tyrosine rich 1                              | 6.54 x 10 <sup>-5</sup> | 0.41                                |
| NUAK1       | NUAK family kinase 1                                      | 6.63 x 10 <sup>-5</sup> | 0.41                                |
| BFSP1       | beaded filament structural protein 1                      | 1.18 x 10 <sup>-4</sup> | 0.40                                |
| SYNE1       | spectrin repeat containing nuclear envelope protein 1     | 1.29 x 10 <sup>-4</sup> | 0.40                                |
| SPON2       | spondin 2                                                 | 1.45 x 10 <sup>-4</sup> | 0.39                                |
| HLA-F-AS1   | HLA-F antisense RNA 1                                     | 1.59 x 10 <sup>-4</sup> | 0.39                                |
| FLJ40288    | uncharacterized FLJ40288                                  | 1.98 x 10 <sup>-4</sup> | 0.39                                |
| PRR5L       | proline rich 5 like                                       | 2.28 x 10 <sup>-4</sup> | 0.38                                |
| TCF7L2      | transcription factor 7 like 2                             | 2.46 x 10 <sup>-4</sup> | 0.38                                |
| TTC22       | tetratricopeptide repeat domain 22                        | 2.48 x 10 <sup>-4</sup> | 0.38                                |
| CMKLR1      | chemerin chemokine-like receptor 1                        | 2.49 x 10 <sup>-4</sup> | 0.38                                |
| ADAMTS1     | ADAM metalloproteinase with thrombospondin type 1 motif 1 | 2.60 x 10 <sup>-4</sup> | 0.38                                |
| OR1D5       | olfactory receptor family 1 subfamily D member 5          | 2.61 x 10 <sup>-4</sup> | 0.38                                |
| MSMB        | microseminoprotein beta                                   | 2.74 x 10 <sup>-4</sup> | 0.38                                |
| NANOG       | Nanog homeobox                                            | 2.95 x 10 <sup>-4</sup> | 0.38                                |
| METTL7B     | methyltransferase like 7B                                 | 3.15 x 10 <sup>-4</sup> | 0.37                                |
| TBX21       | T-box 21                                                  | 3.39 x 10 <sup>-4</sup> | 0.37                                |
| INPP1       | inositol polyphosphate-1-phosphatase                      | 3.45 x 10 <sup>-4</sup> | 0.37                                |
| ME3         | malic enzyme 3                                            | 3.53 x 10 <sup>-4</sup> | 0.37                                |
| ADGRG1      | adhesion G protein-coupled receptor G1                    | 3.79 x 10 <sup>-4</sup> | 0.37                                |
| E2F8        | E2F transcription factor 8                                | 4.13 x 10 <sup>-4</sup> | 0.37                                |
| PCDHGB7     | protocadherin gamma subfamily B, 7                        | 4.38 x 10 <sup>-4</sup> | 0.37                                |
| LOC339874   | uncharacterized LOC339874                                 | 4.39 x 10 <sup>-4</sup> | 0.37                                |
| HMOX1       | heme oxygenase 1                                          | 4.50 x 10 <sup>-4</sup> | 0.36                                |
| ERBB2       | erb-b2 receptor tyrosine kinase 2                         | 4.73 x 10 <sup>-4</sup> | 0.36                                |
| EFNA5       | ephrin A5                                                 | 5.13 x 10 <sup>-4</sup> | 0.36                                |



**Table II.** Differentially expressed genes with age in patients with ischemic stroke from Cohort 2**A** Genes that decrease expression with age

| Gene Symbol | Gene Name                                                                  | <i>P</i> value<br>(FDR-adjusted) | <i>r</i> (partial correlation<br>coefficient) |
|-------------|----------------------------------------------------------------------------|----------------------------------|-----------------------------------------------|
| NBEA        | neurobeachin                                                               | 3.86 x 10 <sup>-7</sup>          | -0.58                                         |
| CXCR5       | C-X-C motif chemokine receptor 5                                           | 4.62 x 10 <sup>-7</sup>          | -0.57                                         |
| SEL1L3      | SEL1L family member 3                                                      | 4.75 x 10 <sup>-7</sup>          | -0.57                                         |
| LINC00494   | long intergenic non-protein coding RNA 494                                 | 6.09 x 10 <sup>-7</sup>          | -0.57                                         |
| OSBPL10     | oxysterol binding protein like 10                                          | 1.08 x 10 <sup>-6</sup>          | -0.56                                         |
| NT5E        | 5'-nucleotidase ecto                                                       | 1.46 x 10 <sup>-6</sup>          | -0.55                                         |
| FAM120C     | family with sequence similarity 120C                                       | 2.01 x 10 <sup>-6</sup>          | -0.55                                         |
| CCR6        | C-C motif chemokine receptor 6                                             | 2.27 x 10 <sup>-6</sup>          | -0.55                                         |
| LRPPRC      | leucine rich pentatricopeptide repeat containing                           | 2.79 x 10 <sup>-6</sup>          | -0.54                                         |
| IGHM        | immunoglobulin heavy constant mu                                           | 3.04 x 10 <sup>-6</sup>          | -0.54                                         |
| CR2         | complement C3d receptor 2                                                  | 3.22 x 10 <sup>-6</sup>          | -0.54                                         |
| FCRLA       | Fc receptor like A                                                         | 3.99 x 10 <sup>-6</sup>          | -0.53                                         |
| RALGPS2     | Ral GEF with PH domain and SH3 binding motif 2                             | 4.09 x 10 <sup>-6</sup>          | -0.53                                         |
| MTOR        | mechanistic target of rapamycin kinase                                     | 4.83 x 10 <sup>-6</sup>          | -0.53                                         |
| P2RX5       | purinergic receptor P2X 5                                                  | 5.31 x 10 <sup>-6</sup>          | -0.53                                         |
| BLNK        | B cell linker                                                              | 5.61 x 10 <sup>-6</sup>          | -0.53                                         |
| BANK1       | B cell scaffold protein with ankyrin repeats 1                             | 5.67 x 10 <sup>-6</sup>          | -0.53                                         |
| SFXN2       | sideroflexin 2                                                             | 6.78 x 10 <sup>-6</sup>          | -0.52                                         |
| RAB30       | RAB30, member RAS oncogene family                                          | 7.05 x 10 <sup>-6</sup>          | -0.52                                         |
| KIF5C       | kinesin family member 5C                                                   | 8.44 x 10 <sup>-6</sup>          | -0.52                                         |
| PNOC        | prepronociceptin                                                           | 1.02 x 10 <sup>-5</sup>          | -0.51                                         |
| DPF3        | double PHD fingers 3                                                       | 1.05 x 10 <sup>-5</sup>          | -0.51                                         |
| TPD52       | tumor protein D52                                                          | 1.40 x 10 <sup>-5</sup>          | -0.51                                         |
| GSPT2       | G1 to S phase transition 2                                                 | 1.47 x 10 <sup>-5</sup>          | -0.51                                         |
| TWINK       | twinkle mtDNA helicase                                                     | 1.50 x 10 <sup>-5</sup>          | -0.51                                         |
| QRSL1       | glutaminyl-tRNA amidotransferase subunit QRSL1                             | 1.65 x 10 <sup>-5</sup>          | -0.50                                         |
| CDCA7L      | cell division cycle associated 7 like                                      | 1.70 x 10 <sup>-5</sup>          | -0.50                                         |
| TNFRSF13C   | TNF receptor superfamily member 13C                                        | 1.76 x 10 <sup>-5</sup>          | -0.50                                         |
| ZFR2        | zinc finger RNA binding protein 2                                          | 1.79 x 10 <sup>-5</sup>          | -0.50                                         |
| EPHA4       | EPH receptor A4                                                            | 1.80 x 10 <sup>-5</sup>          | -0.50                                         |
| RORC        | RAR related orphan receptor C                                              | 1.94 x 10 <sup>-5</sup>          | -0.50                                         |
| PIK3C2B     | phosphatidylinositol-4-phosphate 3-kinase catalytic subunit type 2 beta    | 2.01 x 10 <sup>-5</sup>          | -0.50                                         |
| MICAL3      | microtubule associated monooxygenase, calponin and LIM domain containing 3 | 2.12 x 10 <sup>-5</sup>          | -0.50                                         |

| Gene Symbol | Gene Name                                                                                                                     | P value<br>(FDR-adjusted) | r (partial correlation<br>coefficient) |
|-------------|-------------------------------------------------------------------------------------------------------------------------------|---------------------------|----------------------------------------|
| AGMAT       | agmatinase                                                                                                                    | 2.18 x 10 <sup>-5</sup>   | -0.50                                  |
| POU2AF1     | POU class 2 associating factor 1                                                                                              | 2.23 x 10 <sup>-5</sup>   | -0.50                                  |
| POLR1C      | RNA polymerase I and III subunit C                                                                                            | 2.24 x 10 <sup>-5</sup>   | -0.50                                  |
| TCTN3       | tectonic family member 3                                                                                                      | 2.25 x 10 <sup>-5</sup>   | -0.50                                  |
| CD79B       | CD79b molecule                                                                                                                | 2.31 x 10 <sup>-5</sup>   | -0.50                                  |
| ZBTB24      | zinc finger and BTB domain containing 24                                                                                      | 2.34 x 10 <sup>-5</sup>   | -0.50                                  |
| METTL8      | methyltransferase like 8                                                                                                      | 2.72 x 10 <sup>-5</sup>   | -0.49                                  |
| IL7R        | interleukin 7 receptor                                                                                                        | 2.79 x 10 <sup>-5</sup>   | -0.49                                  |
| FCRL2       | Fc receptor like 2                                                                                                            | 2.87 x 10 <sup>-5</sup>   | -0.49                                  |
| PTPRK       | protein tyrosine phosphatase, receptor type K                                                                                 | 2.87 x 10 <sup>-5</sup>   | -0.49                                  |
| PARM1       | prostate androgen-regulated mucin-like protein 1                                                                              | 2.87 x 10 <sup>-5</sup>   | -0.49                                  |
| FOXP1       | forkhead box P1                                                                                                               | 2.99 x 10 <sup>-5</sup>   | -0.49                                  |
| MAP3K9      | mitogen-activated protein kinase kinase kinase 9                                                                              | 3.08 x 10 <sup>-5</sup>   | -0.49                                  |
| LARGE2      | LARGE xylosyl- and glucuronyltransferase 2                                                                                    | 3.37 x 10 <sup>-5</sup>   | -0.49                                  |
| ZNF268      | zinc finger protein 268                                                                                                       | 3.64 x 10 <sup>-5</sup>   | -0.49                                  |
| KLHL14      | kelch like family member 14                                                                                                   | 3.80 x 10 <sup>-5</sup>   | -0.48                                  |
| SPIB        | Spi-B transcription factor                                                                                                    | 3.81 x 10 <sup>-5</sup>   | -0.48                                  |
| ENPP1       | ectonucleotide pyrophosphatase/phosphodiesterase 1                                                                            | 3.87 x 10 <sup>-5</sup>   | -0.48                                  |
| PAX5        | paired box 5                                                                                                                  | 3.90 x 10 <sup>-5</sup>   | -0.48                                  |
| INO80       | INO80 complex subunit                                                                                                         | 3.94 x 10 <sup>-5</sup>   | -0.48                                  |
| MAP3K4      | mitogen-activated protein kinase kinase kinase 4                                                                              | 4.01 x 10 <sup>-5</sup>   | -0.48                                  |
| PLXNA1      | plexin A1                                                                                                                     | 4.11 x 10 <sup>-5</sup>   | -0.48                                  |
| ATIC        | 5-aminoimidazole-4-carboxamide ribonucleotide formyltransferase /IMP<br>cyclohydrolase                                        | 4.28 x 10 <sup>-5</sup>   | -0.48                                  |
| TCP1        | t-complex 1                                                                                                                   | 4.35 x 10 <sup>-5</sup>   | -0.48                                  |
| USP13       | ubiquitin specific peptidase 13                                                                                               | 4.39 x 10 <sup>-5</sup>   | -0.48                                  |
| PITRM1      | pitrilysin metallopeptidase 1                                                                                                 | 4.53 x 10 <sup>-5</sup>   | -0.48                                  |
| ARL10       | ADP ribosylation factor like GTPase 10                                                                                        | 4.58 x 10 <sup>-5</sup>   | -0.48                                  |
| PMEPA1      | prostate transmembrane protein, androgen induced 1                                                                            | 4.70 x 10 <sup>-5</sup>   | -0.48                                  |
| PEG10       | paternally expressed 10                                                                                                       | 4.71 x 10 <sup>-5</sup>   | -0.48                                  |
| CEP72       | centrosomal protein 72                                                                                                        | 4.73 x 10 <sup>-5</sup>   | -0.48                                  |
| LSR         | lipolysis stimulated lipoprotein receptor                                                                                     | 4.83 x 10 <sup>-5</sup>   | -0.48                                  |
| GART        | phosphoribosylglycinamide formyltransferase, phosphoribosylglycinamide synthetase,<br>phosphoribosylaminoimidazole synthetase | 5.24 x 10 <sup>-5</sup>   | -0.48                                  |
| FBXL16      | F-box and leucine rich repeat protein 16                                                                                      | 5.42 x 10 <sup>-5</sup>   | -0.48                                  |
| SDK2        | sidekick cell adhesion molecule 2                                                                                             | 5.70 x 10 <sup>-5</sup>   | -0.47                                  |
| SIRPG       | signal regulatory protein gamma                                                                                               | 5.77 x 10 <sup>-5</sup>   | -0.47                                  |
| IMPDH2      | inosine monophosphate dehydrogenase 2                                                                                         | 5.80 x 10 <sup>-5</sup>   | -0.47                                  |

| Gene Symbol | Gene Name                                                               | P value<br>(FDR-adjusted) | r (partial correlation<br>coefficient) |
|-------------|-------------------------------------------------------------------------|---------------------------|----------------------------------------|
| SNX9        | sorting nexin 9                                                         | 6.04 x 10 <sup>-5</sup>   | -0.47                                  |
| SMYD5       | SMYD family member 5                                                    | 6.05 x 10 <sup>-5</sup>   | -0.47                                  |
| COBLL1      | cordon-bleu WH2 repeat protein like 1                                   | 6.07 x 10 <sup>-5</sup>   | -0.47                                  |
| SHMT2       | serine hydroxymethyltransferase 2                                       | 6.16 x 10 <sup>-5</sup>   | -0.47                                  |
| FOXO1       | forkhead box O1                                                         | 6.32 x 10 <sup>-5</sup>   | -0.47                                  |
| KIAA0586    | KIAA0586                                                                | 6.34 x 10 <sup>-5</sup>   | -0.47                                  |
| AKT3        | AKT serine/threonine kinase 3                                           | 6.38 x 10 <sup>-5</sup>   | -0.47                                  |
| TTC3        | tetratricopeptide repeat domain 3                                       | 6.51 x 10 <sup>-5</sup>   | -0.47                                  |
| CFL2        | cofilin 2                                                               | 6.62 x 10 <sup>-5</sup>   | -0.47                                  |
| STRBP       | spermatid perinuclear RNA binding protein                               | 6.70 x 10 <sup>-5</sup>   | -0.47                                  |
| PHF10       | PHD finger protein 10                                                   | 7.08 x 10 <sup>-5</sup>   | -0.47                                  |
| PRAG1       | PEAK1 related, kinase-activating pseudokinase 1                         | 7.10 x 10 <sup>-5</sup>   | -0.47                                  |
| FBXO10      | F-box protein 10                                                        | 7.14 x 10 <sup>-5</sup>   | -0.47                                  |
| METAP1D     | methionyl aminopeptidase type 1D, mitochondrial                         | 7.20 x 10 <sup>-5</sup>   | -0.47                                  |
| RCAN3       | RCAN family member 3                                                    | 7.24 x 10 <sup>-5</sup>   | -0.47                                  |
| SPTBN1      | spectrin beta, non-erythrocytic 1                                       | 7.34 x 10 <sup>-5</sup>   | -0.47                                  |
| IARS        | isoleucyl-tRNA synthetase                                               | 8.28 x 10 <sup>-5</sup>   | -0.47                                  |
| ALG1        | ALG1 chitobiosyldiphosphodolichol beta-mannosyltransferase              | 8.34 x 10 <sup>-5</sup>   | -0.47                                  |
| LDLRAP1     | low density lipoprotein receptor adaptor protein 1                      | 8.62 x 10 <sup>-5</sup>   | -0.46                                  |
| EPRS        | glutamyl-prolyl-tRNA synthetase                                         | 9.04 x 10 <sup>-5</sup>   | -0.46                                  |
| HS3ST1      | heparan sulfate-glucosamine 3-sulfotransferase 1                        | 9.31 x 10 <sup>-5</sup>   | -0.46                                  |
| PDS5A       | PDS5 cohesin associated factor A                                        | 9.41 x 10 <sup>-5</sup>   | -0.46                                  |
| DENND5B     | DENN domain containing 5B                                               | 1.06 x 10 <sup>-4</sup>   | -0.46                                  |
| EIF2D       | eukaryotic translation initiation factor 2D                             | 1.06 x 10 <sup>-4</sup>   | -0.46                                  |
| MYCBP2      | MYC binding protein 2, E3 ubiquitin protein ligase                      | 1.06 x 10 <sup>-4</sup>   | -0.46                                  |
| PLPP5       | phospholipid phosphatase 5                                              | 1.08 x 10 <sup>-4</sup>   | -0.46                                  |
| TRIM47      | tripartite motif containing 47                                          | 1.08 x 10 <sup>-4</sup>   | -0.46                                  |
| ALDH18A1    | aldehyde dehydrogenase 18 family member A1                              | 1.10 x 10 <sup>-4</sup>   | -0.46                                  |
| VPREB3      | V-set pre-B cell surrogate light chain 3                                | 1.10 x 10 <sup>-4</sup>   | -0.46                                  |
| CLUAP1      | clusterin associated protein 1                                          | 1.12 x 10 <sup>-4</sup>   | -0.46                                  |
| CNFN        | cornifelin                                                              | 1.12 x 10 <sup>-4</sup>   | -0.46                                  |
| TNRC6A      | trinucleotide repeat containing adaptor 6A                              | 1.14 x 10 <sup>-4</sup>   | -0.46                                  |
| PEBP1       | phosphatidylethanolamine binding protein 1                              | 1.16 x 10 <sup>-4</sup>   | -0.46                                  |
| SPOCK2      | SPARC (osteonectin), cwcv and kazal like domains proteoglycan 2         | 1.16 x 10 <sup>-4</sup>   | -0.46                                  |
| PPRC1       | peroxisome proliferator-activated receptor gamma, coactivator-related 1 | 1.18 x 10 <sup>-4</sup>   | -0.46                                  |
| DTX1        | deltex E3 ubiquitin ligase 1                                            | 1.19 x 10 <sup>-4</sup>   | -0.46                                  |
| LY9         | lymphocyte antigen 9                                                    | 1.20 x 10 <sup>-4</sup>   | -0.46                                  |
| N4BP3       | NEDD4 binding protein 3                                                 | 1.24 x 10 <sup>-4</sup>   | -0.46                                  |

| Gene Symbol | Gene Name                                                                        | P value<br>(FDR-adjusted) | r (partial correlation<br>coefficient) |
|-------------|----------------------------------------------------------------------------------|---------------------------|----------------------------------------|
| ID3         | inhibitor of DNA binding 3, HLH protein                                          | 1.28 x 10 <sup>-4</sup>   | -0.45                                  |
| SLAMF1      | signaling lymphocytic activation molecule family member 1                        | 1.28 x 10 <sup>-4</sup>   | -0.45                                  |
| VWA8        | von Willebrand factor A domain containing 8                                      | 1.28 x 10 <sup>-4</sup>   | -0.45                                  |
| CAD         | carbamoyl-phosphate synthetase 2, aspartate transcarbamylase, and dihydroorotase | 1.33 x 10 <sup>-4</sup>   | -0.45                                  |
| CD200       | CD200 molecule                                                                   | 1.34 x 10 <sup>-4</sup>   | -0.45                                  |
| ABLIM1      | actin binding LIM protein 1                                                      | 1.35 x 10 <sup>-4</sup>   | -0.45                                  |
| IPO5        | importin 5                                                                       | 1.35 x 10 <sup>-4</sup>   | -0.45                                  |
| ITPR1       | inositol 1,4,5-trisphosphate receptor type 1                                     | 1.36 x 10 <sup>-4</sup>   | -0.45                                  |
| SWAP70      | switching B cell complex subunit SWAP70                                          | 1.36 x 10 <sup>-4</sup>   | -0.45                                  |
| NR3C2       | nuclear receptor subfamily 3 group C member 2                                    | 1.39 x 10 <sup>-4</sup>   | -0.45                                  |
| NOLC1       | nucleolar and coiled-body phosphoprotein 1                                       | 1.40 x 10 <sup>-4</sup>   | -0.45                                  |
| CHD1L       | chromodomain helicase DNA binding protein 1 like                                 | 1.43 x 10 <sup>-4</sup>   | -0.45                                  |
| MGAT5       | alpha-1,6-mannosylglycoprotein 6-beta-N-acetylglucosaminyltransferase            | 1.45 x 10 <sup>-4</sup>   | -0.45                                  |
| KIF3B       | kinesin family member 3B                                                         | 1.46 x 10 <sup>-4</sup>   | -0.45                                  |
| MORC2       | MORC family CW-type zinc finger 2                                                | 1.51 x 10 <sup>-4</sup>   | -0.45                                  |
| ZBTB5       | zinc finger and BTB domain containing 5                                          | 1.51 x 10 <sup>-4</sup>   | -0.45                                  |
| OBSCN       | obscurin, cytoskeletal calmodulin and titin-interacting RhoGEF                   | 1.55 x 10 <sup>-4</sup>   | -0.45                                  |
| PLEKHG1     | pleckstrin homology and RhoGEF domain containing G1                              | 1.55 x 10 <sup>-4</sup>   | -0.45                                  |
| RPAP1       | RNA polymerase II associated protein 1                                           | 1.58 x 10 <sup>-4</sup>   | -0.45                                  |
| ZNF711      | zinc finger protein 711                                                          | 1.61 x 10 <sup>-4</sup>   | -0.45                                  |
| TLE2        | TLE family member 2, transcriptional corepressor                                 | 1.63 x 10 <sup>-4</sup>   | -0.45                                  |
| HAR1A       | highly accelerated region 1A                                                     | 1.64 x 10 <sup>-4</sup>   | -0.45                                  |
| NSMCE1      | NSE1 homolog, SMC5-SMC6 complex component                                        | 1.64 x 10 <sup>-4</sup>   | -0.45                                  |
| CD40        | CD40 molecule                                                                    | 1.67 x 10 <sup>-4</sup>   | -0.45                                  |
| CCT6A       | chaperonin containing TCP1 subunit 6A                                            | 1.68 x 10 <sup>-4</sup>   | -0.45                                  |
| MRTFB       | myocardin related transcription factor B                                         | 1.68 x 10 <sup>-4</sup>   | -0.45                                  |
| TRAF3IP2    | TRAF3 interacting protein 2                                                      | 1.68 x 10 <sup>-4</sup>   | -0.45                                  |
| B4GAT1      | beta-1,4-glucuronyltransferase 1                                                 | 1.69 x 10 <sup>-4</sup>   | -0.45                                  |
| RWDD2A      | RWD domain containing 2A                                                         | 1.72 x 10 <sup>-4</sup>   | -0.45                                  |
| ADAM23      | ADAM metallopeptidase domain 23                                                  | 1.73 x 10 <sup>-4</sup>   | -0.45                                  |
| MCF2L       | MCF.2 cell line derived transforming sequence like                               | 1.77 x 10 <sup>-4</sup>   | -0.45                                  |
| CCR7        | C-C motif chemokine receptor 7                                                   | 1.82 x 10 <sup>-4</sup>   | -0.45                                  |
| TRIM44      | tripartite motif containing 44                                                   | 1.86 x 10 <sup>-4</sup>   | -0.44                                  |
| EEF2KMT     | eukaryotic elongation factor 2 lysine methyltransferase                          | 1.88 x 10 <sup>-4</sup>   | -0.44                                  |
| FGF9        | fibroblast growth factor 9                                                       | 1.90 x 10 <sup>-4</sup>   | -0.44                                  |
| CYB561A3    | cytochrome b561 family member A3                                                 | 1.91 x 10 <sup>-4</sup>   | -0.44                                  |
| ZNF544      | zinc finger protein 544                                                          | 1.93 x 10 <sup>-4</sup>   | -0.44                                  |
| AKAP1       | A-kinase anchoring protein 1                                                     | 1.96 x 10 <sup>-4</sup>   | -0.44                                  |

| Gene Symbol | Gene Name                                                                                               | P value<br>(FDR-adjusted) | r (partial correlation<br>coefficient) |
|-------------|---------------------------------------------------------------------------------------------------------|---------------------------|----------------------------------------|
| SLC2A5      | solute carrier family 2 member 5                                                                        | 1.97 x 10 <sup>-4</sup>   | -0.44                                  |
| SPTAN1      | spectrin alpha, non-erythrocytic 1                                                                      | 1.98 x 10 <sup>-4</sup>   | -0.44                                  |
| KIAA1147    | KIAA1147                                                                                                | 2.03 x 10 <sup>-4</sup>   | -0.44                                  |
| TBCK        | TBC1 domain containing kinase                                                                           | 2.06 x 10 <sup>-4</sup>   | -0.44                                  |
| IPO7        | importin 7                                                                                              | 2.11 x 10 <sup>-4</sup>   | -0.44                                  |
| SUSD4       | sushi domain containing 4                                                                               | 2.13 x 10 <sup>-4</sup>   | -0.44                                  |
| TMEM18      | transmembrane protein 18                                                                                | 2.13 x 10 <sup>-4</sup>   | -0.44                                  |
| GPHN        | gephyrin                                                                                                | 2.14 x 10 <sup>-4</sup>   | -0.44                                  |
| GORASP2     | golgi reassembly stacking protein 2                                                                     | 2.16 x 10 <sup>-4</sup>   | -0.44                                  |
| IRAK1BP1    | interleukin 1 receptor associated kinase 1 binding protein 1                                            | 2.16 x 10 <sup>-4</sup>   | -0.44                                  |
| PAICS       | phosphoribosylaminoimidazole carboxylase and<br>phosphoribosylaminoimidazolesuccinocarboxamide synthase | 2.25 x 10 <sup>-4</sup>   | -0.44                                  |
| MEN1        | menin 1                                                                                                 | 2.37 x 10 <sup>-4</sup>   | -0.44                                  |
| NEDD4L      | neural precursor cell expressed, developmentally down-regulated 4-like, E3 ubiquitin<br>protein ligase  | 2.39 x 10 <sup>-4</sup>   | -0.44                                  |
| SYBU        | syntabulin                                                                                              | 2.41 x 10 <sup>-4</sup>   | -0.44                                  |
| PPP1R3E     | protein phosphatase 1 regulatory subunit 3E                                                             | 2.42 x 10 <sup>-4</sup>   | -0.44                                  |
| ZNF777      | zinc finger protein 777                                                                                 | 2.43 x 10 <sup>-4</sup>   | -0.44                                  |
| ANK1        | ankyrin 1                                                                                               | 2.44 x 10 <sup>-4</sup>   | -0.44                                  |
| PLCXD1      | phosphatidylinositol specific phospholipase C domain containing 1                                       | 2.50 x 10 <sup>-4</sup>   | -0.44                                  |
| CAMK2N1     | calcium/calmodulin dependent protein kinase II inhibitor 1                                              | 2.51 x 10 <sup>-4</sup>   | -0.44                                  |
| URGCP       | upregulator of cell proliferation                                                                       | 2.55 x 10 <sup>-4</sup>   | -0.44                                  |
| ACP6        | acid phosphatase 6, lysophosphatidic                                                                    | 2.56 x 10 <sup>-4</sup>   | -0.44                                  |
| MAGEF1      | MAGE family member F1                                                                                   | 2.57 x 10 <sup>-4</sup>   | -0.44                                  |
| RRS1        | ribosome biogenesis regulator homolog                                                                   | 2.62 x 10 <sup>-4</sup>   | -0.44                                  |
| IFT57       | intraflagellar transport 57                                                                             | 2.65 x 10 <sup>-4</sup>   | -0.44                                  |
| EIF2AK3     | eukaryotic translation initiation factor 2 alpha kinase 3                                               | 2.72 x 10 <sup>-4</sup>   | -0.43                                  |
| AFG3L2      | AFG3 like matrix AAA peptidase subunit 2                                                                | 2.75 x 10 <sup>-4</sup>   | -0.43                                  |
| RABEP1      | rabaptin, RAB GTPase binding effector protein 1                                                         | 2.75 x 10 <sup>-4</sup>   | -0.43                                  |
| C11orf24    | chromosome 11 open reading frame 24                                                                     | 2.77 x 10 <sup>-4</sup>   | -0.43                                  |
| CASK        | calcium/calmodulin dependent serine protein kinase                                                      | 2.82 x 10 <sup>-4</sup>   | -0.43                                  |
| ILF3        | interleukin enhancer binding factor 3                                                                   | 2.83 x 10 <sup>-4</sup>   | -0.43                                  |
| AMN         | amnion associated transmembrane protein                                                                 | 2.85 x 10 <sup>-4</sup>   | -0.43                                  |
| RASGRF2     | Ras protein specific guanine nucleotide releasing factor 2                                              | 2.85 x 10 <sup>-4</sup>   | -0.43                                  |
| TCF3        | transcription factor 3                                                                                  | 2.85 x 10 <sup>-4</sup>   | -0.43                                  |
| ENAM        | enamelin                                                                                                | 2.87 x 10 <sup>-4</sup>   | -0.43                                  |
| FCER2       | Fc fragment of IgE receptor II                                                                          | 2.92 x 10 <sup>-4</sup>   | -0.43                                  |
| CELSR1      | cadherin EGF LAG seven-pass G-type receptor 1                                                           | 2.94 x 10 <sup>-4</sup>   | -0.43                                  |

| Gene Symbol | Gene Name                                                  | <i>P</i> value<br>(FDR-adjusted) | <i>r</i> (partial correlation<br>coefficient) |
|-------------|------------------------------------------------------------|----------------------------------|-----------------------------------------------|
| BHLHE41     | basic helix-loop-helix family member e41                   | 2.97 x 10 <sup>-4</sup>          | -0.43                                         |
| MAGED1      | MAGE family member D1                                      | 2.98 x 10 <sup>-4</sup>          | -0.43                                         |
| LARS        | leucyl-tRNA synthetase                                     | 3.03 x 10 <sup>-4</sup>          | -0.43                                         |
| EXD2        | exonuclease 3'-5' domain containing 2                      | 3.04 x 10 <sup>-4</sup>          | -0.43                                         |
| KCNC4       | potassium voltage-gated channel subfamily C member 4       | 3.08 x 10 <sup>-4</sup>          | -0.43                                         |
| NIPSNAP1    | nipsnap homolog 1                                          | 3.13 x 10 <sup>-4</sup>          | -0.43                                         |
| OIP5-AS1    | OIP5 antisense RNA 1                                       | 3.19 x 10 <sup>-4</sup>          | -0.43                                         |
| TMEM231     | transmembrane protein 231                                  | 3.20 x 10 <sup>-4</sup>          | -0.43                                         |
| CAMK4       | calcium/calmodulin dependent protein kinase IV             | 3.26 x 10 <sup>-4</sup>          | -0.43                                         |
| FCRL1       | Fc receptor like 1                                         | 3.26 x 10 <sup>-4</sup>          | -0.43                                         |
| BMS1        | BMS1 ribosome biogenesis factor                            | 3.28 x 10 <sup>-4</sup>          | -0.43                                         |
| DROSHA      | drosha ribonuclease III                                    | 3.29 x 10 <sup>-4</sup>          | -0.43                                         |
| NIBAN3      | niban apoptosis regulator 3                                | 3.33 x 10 <sup>-4</sup>          | -0.43                                         |
| CPNE5       | copine 5                                                   | 3.37 x 10 <sup>-4</sup>          | -0.43                                         |
| CBLL1       | Cbl proto-oncogene like 1                                  | 3.38 x 10 <sup>-4</sup>          | -0.43                                         |
| SIGMAR1     | sigma non-opioid intracellular receptor 1                  | 3.39 x 10 <sup>-4</sup>          | -0.43                                         |
| CARD11      | caspase recruitment domain family member 11                | 3.40 x 10 <sup>-4</sup>          | -0.43                                         |
| RPL10A      | ribosomal protein L10a                                     | 3.41 x 10 <sup>-4</sup>          | -0.43                                         |
| ZFP82       | ZFP82 zinc finger protein                                  | 3.42 x 10 <sup>-4</sup>          | -0.43                                         |
| KLF8        | Kruppel like factor 8                                      | 3.45 x 10 <sup>-4</sup>          | -0.43                                         |
| PLEKHG4     | pleckstrin homology and RhoGEF domain containing G4        | 3.47 x 10 <sup>-4</sup>          | -0.43                                         |
| GOT2        | glutamic-oxaloacetic transaminase 2                        | 3.52 x 10 <sup>-4</sup>          | -0.43                                         |
| DFFA        | DNA fragmentation factor subunit alpha                     | 3.56 x 10 <sup>-4</sup>          | -0.43                                         |
| C17orf51    | chromosome 17 open reading frame 51                        | 3.56 x 10 <sup>-4</sup>          | -0.43                                         |
| ANKS6       | ankyrin repeat and sterile alpha motif domain containing 6 | 3.56 x 10 <sup>-4</sup>          | -0.43                                         |
| B3GALT2     | beta-1,3-galactosyltransferase 2                           | 3.56 x 10 <sup>-4</sup>          | -0.43                                         |
| ELL3        | elongation factor for RNA polymerase II 3                  | 3.65 x 10 <sup>-4</sup>          | -0.43                                         |
| NELL2       | neural EGFL like 2                                         | 3.67 x 10 <sup>-4</sup>          | -0.43                                         |
| BEND4       | BEN domain containing 4                                    | 3.70 x 10 <sup>-4</sup>          | -0.43                                         |
| HNRNPU      | heterogeneous nuclear ribonucleoprotein U                  | 3.71 x 10 <sup>-4</sup>          | -0.43                                         |
| POLH        | DNA polymerase eta                                         | 3.72 x 10 <sup>-4</sup>          | -0.43                                         |
| ATF7IP2     | activating transcription factor 7 interacting protein 2    | 3.74 x 10 <sup>-4</sup>          | -0.43                                         |
| ZNF101      | zinc finger protein 101                                    | 3.77 x 10 <sup>-4</sup>          | -0.43                                         |
| TMEM204     | transmembrane protein 204                                  | 3.79 x 10 <sup>-4</sup>          | -0.43                                         |
| CRTC3       | CREB regulated transcription coactivator 3                 | 3.80 x 10 <sup>-4</sup>          | -0.43                                         |
| MTUS1       | microtubule associated scaffold protein 1                  | 3.84 x 10 <sup>-4</sup>          | -0.42                                         |

| Gene Symbol | Gene Name                                               | P value<br>(FDR-adjusted) | r (partial correlation<br>coefficient) |
|-------------|---------------------------------------------------------|---------------------------|----------------------------------------|
| SH3BP5      | SH3 domain binding protein 5                            | 3.86 x 10 <sup>-4</sup>   | -0.42                                  |
| COL4A4      | collagen type IV alpha 4 chain                          | 3.90 x 10 <sup>-4</sup>   | -0.42                                  |
| POLR1B      | RNA polymerase I subunit B                              | 3.90 x 10 <sup>-4</sup>   | -0.42                                  |
| WNT2B       | Wnt family member 2B                                    | 3.92 x 10 <sup>-4</sup>   | -0.42                                  |
| NUP43       | nucleoporin 43                                          | 3.93 x 10 <sup>-4</sup>   | -0.42                                  |
| ARID5B      | AT-rich interaction domain 5B                           | 4.02 x 10 <sup>-4</sup>   | -0.42                                  |
| BCL7A       | BAF chromatin remodeling complex subunit BCL7A          | 4.14 x 10 <sup>-4</sup>   | -0.42                                  |
| CD44        | CD44 molecule (Indian blood group)                      | 4.17 x 10 <sup>-4</sup>   | -0.42                                  |
| SGCE        | sarcoglycan epsilon                                     | 4.21 x 10 <sup>-4</sup>   | -0.42                                  |
| IKZF3       | IKAROS family zinc finger 3                             | 4.31 x 10 <sup>-4</sup>   | -0.42                                  |
| NCL         | nucleolin                                               | 4.38 x 10 <sup>-4</sup>   | -0.42                                  |
| WDR34       | WD repeat domain 34                                     | 4.38 x 10 <sup>-4</sup>   | -0.42                                  |
| BCL11A      | BAF chromatin remodeling complex subunit BCL11A         | 4.41 x 10 <sup>-4</sup>   | -0.42                                  |
| RRP1B       | ribosomal RNA processing 1B                             | 4.41 x 10 <sup>-4</sup>   | -0.42                                  |
| GPRASP1     | G protein-coupled receptor associated sorting protein 1 | 4.44 x 10 <sup>-4</sup>   | -0.42                                  |
| SYNPO       | synaptopodin                                            | 4.51 x 10 <sup>-4</sup>   | -0.42                                  |
| MEF2C       | myocyte enhancer factor 2C                              | 4.58 x 10 <sup>-4</sup>   | -0.42                                  |
| DCAF4       | DDB1 and CUL4 associated factor 4                       | 4.59 x 10 <sup>-4</sup>   | -0.42                                  |
| DSEL        | dermatan sulfate epimerase like                         | 4.61 x 10 <sup>-4</sup>   | -0.42                                  |
| GUF1        | GUF1 homolog, GTPase                                    | 4.79 x 10 <sup>-4</sup>   | -0.42                                  |
| PUS1        | pseudouridine synthase 1                                | 4.79 x 10 <sup>-4</sup>   | -0.42                                  |
| C12orf65    | chromosome 12 open reading frame 65                     | 4.80 x 10 <sup>-4</sup>   | -0.42                                  |
| SNX25       | sorting nexin 25                                        | 4.82 x 10 <sup>-4</sup>   | -0.42                                  |
| RASGRP3     | RAS guanyl releasing protein 3                          | 4.85 x 10 <sup>-4</sup>   | -0.42                                  |
| CAMTA1      | calmodulin binding transcription activator 1            | 4.91 x 10 <sup>-4</sup>   | -0.42                                  |
| TYW1        | tRNA-yW synthesizing protein 1 homolog                  | 5.00 x 10 <sup>-4</sup>   | -0.42                                  |
| ELK3        | ETS transcription factor ELK3                           | 5.06 x 10 <sup>-4</sup>   | -0.42                                  |
| SLC12A2     | solute carrier family 12 member 2                       | 5.08 x 10 <sup>-4</sup>   | -0.42                                  |
| MOAP1       | modulator of apoptosis 1                                | 5.24 x 10 <sup>-4</sup>   | -0.42                                  |
| FAM98A      | family with sequence similarity 98 member A             | 5.25 x 10 <sup>-4</sup>   | -0.42                                  |
| MATN2       | matrilin 2                                              | 5.25 x 10 <sup>-4</sup>   | -0.42                                  |
| PRXL2A      | peroxiredoxin like 2A                                   | 5.25 x 10 <sup>-4</sup>   | -0.42                                  |
| ADAM12      | ADAM metallopeptidase domain 12                         | 5.26 x 10 <sup>-4</sup>   | -0.42                                  |
| UTP4        | UTP4 small subunit processome component                 | 5.29 x 10 <sup>-4</sup>   | -0.42                                  |
| USP51       | ubiquitin specific peptidase 51                         | 5.36 x 10 <sup>-4</sup>   | -0.42                                  |
| ELP4        | elongator acetyltransferase complex subunit 4           | 5.38 x 10 <sup>-4</sup>   | -0.42                                  |

| Gene Symbol | Gene Name                                                  | P value<br>(FDR-adjusted) | r (partial correlation<br>coefficient) |
|-------------|------------------------------------------------------------|---------------------------|----------------------------------------|
| PCED1B      | PC-esterase domain containing 1B                           | 5.41 x 10 <sup>-4</sup>   | -0.41                                  |
| SRP68       | signal recognition particle 68                             | 5.41 x 10 <sup>-4</sup>   | -0.41                                  |
| ABCA17P     | ATP binding cassette subfamily A member 17, pseudogene     | 5.64 x 10 <sup>-4</sup>   | -0.41                                  |
| ZNF275      | zinc finger protein 275                                    | 5.64 x 10 <sup>-4</sup>   | -0.41                                  |
| SLC38A1     | solute carrier family 38 member 1                          | 5.66 x 10 <sup>-4</sup>   | -0.41                                  |
| CYP2E1      | cytochrome P450 family 2 subfamily E member 1              | 5.69 x 10 <sup>-4</sup>   | -0.41                                  |
| PRDM4       | PR/SET domain 4                                            | 5.70 x 10 <sup>-4</sup>   | -0.41                                  |
| SPON1       | spondin 1                                                  | 5.80 x 10 <sup>-4</sup>   | -0.41                                  |
| VEGFB       | vascular endothelial growth factor B                       | 5.80 x 10 <sup>-4</sup>   | -0.41                                  |
| RSL1D1      | ribosomal L1 domain containing 1                           | 5.85 x 10 <sup>-4</sup>   | -0.41                                  |
| TCF4        | transcription factor 4                                     | 5.93 x 10 <sup>-4</sup>   | -0.41                                  |
| EIF3L       | eukaryotic translation initiation factor 3 subunit L       | 5.94 x 10 <sup>-4</sup>   | -0.41                                  |
| RNGTT       | RNA guanylyltransferase and 5'-phosphatase                 | 5.95 x 10 <sup>-4</sup>   | -0.41                                  |
| SLCO5A1     | solute carrier organic anion transporter family member 5A1 | 5.95 x 10 <sup>-4</sup>   | -0.41                                  |
| ECI2        | enoyl-CoA delta isomerase 2                                | 5.97 x 10 <sup>-4</sup>   | -0.41                                  |
| GDF7        | growth differentiation factor 7                            | 5.97 x 10 <sup>-4</sup>   | -0.41                                  |
| ZNF337      | zinc finger protein 337                                    | 5.99 x 10 <sup>-4</sup>   | -0.41                                  |
| TESPA1      | thymocyte expressed, positive selection associated 1       | 6.10 x 10 <sup>-4</sup>   | -0.41                                  |
| RPRD2       | regulation of nuclear pre-mRNA domain containing 2         | 6.11 x 10 <sup>-4</sup>   | -0.41                                  |
| DANCR       | differentiation antagonizing non-protein coding RNA        | 6.14 x 10 <sup>-4</sup>   | -0.41                                  |
| ALG9        | ALG9 alpha-1,2-mannosyltransferase                         | 6.41 x 10 <sup>-4</sup>   | -0.41                                  |
| UTP14A      | UTP14A small subunit processome component                  | 6.42 x 10 <sup>-4</sup>   | -0.41                                  |
| GATA3       | GATA binding protein 3                                     | 6.44 x 10 <sup>-4</sup>   | -0.41                                  |
| IKZF1       | IKAROS family zinc finger 1                                | 6.51 x 10 <sup>-4</sup>   | -0.41                                  |
| ABCB8       | ATP binding cassette subfamily B member 8                  | 6.64 x 10 <sup>-4</sup>   | -0.41                                  |
| AXIN2       | axin 2                                                     | 6.64 x 10 <sup>-4</sup>   | -0.41                                  |
| BRD3OS      | BRD3 opposite strand                                       | 6.84 x 10 <sup>-4</sup>   | -0.41                                  |
| KAT6B       | lysine acetyltransferase 6B                                | 6.85 x 10 <sup>-4</sup>   | -0.41                                  |
| PATJ        | PATJ crumbs cell polarity complex component                | 6.86 x 10 <sup>-4</sup>   | -0.41                                  |
| TTL11       | tubulin tyrosine ligase like 11                            | 6.86 x 10 <sup>-4</sup>   | -0.41                                  |
| NFX1        | nuclear transcription factor, X-box binding 1              | 6.92 x 10 <sup>-4</sup>   | -0.41                                  |
| HEATR1      | HEAT repeat containing 1                                   | 6.95 x 10 <sup>-4</sup>   | -0.41                                  |
| LNP1        | leukemia NUP98 fusion partner 1                            | 6.96 x 10 <sup>-4</sup>   | -0.41                                  |
| MDN1        | midasin AAA ATPase 1                                       | 6.97 x 10 <sup>-4</sup>   | -0.41                                  |
| ASNS        | asparagine synthetase (glutamine-hydrolyzing)              | 7.00 x 10 <sup>-4</sup>   | -0.41                                  |
| ANK3        | ankyrin 3                                                  | 7.04 x 10 <sup>-4</sup>   | -0.41                                  |



| Gene Symbol | Gene Name                                                             | <i>P</i> value<br>(FDR-adjusted) | <i>r</i> (partial correlation<br>coefficient) |
|-------------|-----------------------------------------------------------------------|----------------------------------|-----------------------------------------------|
| FBXO31      | F-box protein 31                                                      | 7.08 x 10 <sup>-4</sup>          | -0.41                                         |
| CORO2B      | coronin 2B                                                            | 7.09 x 10 <sup>-4</sup>          | -0.41                                         |
| PLEKHB1     | pleckstrin homology domain containing B1                              | 7.12 x 10 <sup>-4</sup>          | -0.41                                         |
| DHRS4-AS1   | DHRS4 antisense RNA 1                                                 | 7.14 x 10 <sup>-4</sup>          | -0.41                                         |
| OGFOD1      | 2-oxoglutarate and iron dependent oxygenase domain containing 1       | 7.15 x 10 <sup>-4</sup>          | -0.41                                         |
| UTP25       | UTP25 small subunit processor component                               | 7.24 x 10 <sup>-4</sup>          | -0.41                                         |
| NAF1        | nuclear assembly factor 1 ribonucleoprotein                           | 7.35 x 10 <sup>-4</sup>          | -0.41                                         |
| PRKCA       | protein kinase C alpha                                                | 7.35 x 10 <sup>-4</sup>          | -0.41                                         |
| KAT14       | lysine acetyltransferase 14                                           | 7.38 x 10 <sup>-4</sup>          | -0.41                                         |
| IL7         | interleukin 7                                                         | 7.50 x 10 <sup>-4</sup>          | -0.41                                         |
| RPL13       | ribosomal protein L13                                                 | 7.54 x 10 <sup>-4</sup>          | -0.41                                         |
| USP36       | ubiquitin specific peptidase 36                                       | 7.54 x 10 <sup>-4</sup>          | -0.41                                         |
| SPRY1       | sprouty RTK signaling antagonist 1                                    | 7.62 x 10 <sup>-4</sup>          | -0.40                                         |
| POLR3B      | RNA polymerase III subunit B                                          | 7.63 x 10 <sup>-4</sup>          | -0.40                                         |
| ZXDB        | zinc finger X-linked duplicated B                                     | 7.68 x 10 <sup>-4</sup>          | -0.40                                         |
| CEP68       | centrosomal protein 68                                                | 7.76 x 10 <sup>-4</sup>          | -0.40                                         |
| THEM4       | thioesterase superfamily member 4                                     | 7.82 x 10 <sup>-4</sup>          | -0.40                                         |
| GGA2        | golgi associated, gamma adaptin ear containing, ARF binding protein 2 | 7.94 x 10 <sup>-4</sup>          | -0.40                                         |
| LDOC1       | LDOC1 regulator of NFkB signaling                                     | 7.94 x 10 <sup>-4</sup>          | -0.40                                         |
| AEBP1       | AE binding protein 1                                                  | 7.95 x 10 <sup>-4</sup>          | -0.40                                         |
| CARMIL2     | capping protein regulator and myosin 1 linker 2                       | 8.00 x 10 <sup>-4</sup>          | -0.40                                         |
| GRSF1       | G-rich RNA sequence binding factor 1                                  | 8.04 x 10 <sup>-4</sup>          | -0.40                                         |
| NVL         | nuclear VCP-like                                                      | 8.05 x 10 <sup>-4</sup>          | -0.40                                         |
| WDR92       | WD repeat domain 92                                                   | 8.10 x 10 <sup>-4</sup>          | -0.40                                         |
| LDHB        | lactate dehydrogenase B                                               | 8.14 x 10 <sup>-4</sup>          | -0.40                                         |
| SHISAL2A    | shisa like 2A                                                         | 8.14 x 10 <sup>-4</sup>          | -0.40                                         |
| FARSB       | phenylalanyl-tRNA synthetase subunit beta                             | 8.15 x 10 <sup>-4</sup>          | -0.40                                         |
| TSPYL5      | TSPY like 5                                                           | 8.32 x 10 <sup>-4</sup>          | -0.40                                         |
| CCT3        | chaperonin containing TCP1 subunit 3                                  | 8.39 x 10 <sup>-4</sup>          | -0.40                                         |
| SERGEF      | secretion regulating guanine nucleotide exchange factor               | 8.41 x 10 <sup>-4</sup>          | -0.40                                         |
| DGKA        | diacylglycerol kinase alpha                                           | 8.42 x 10 <sup>-4</sup>          | -0.40                                         |
| MAGEE1      | MAGE family member E1                                                 | 8.42 x 10 <sup>-4</sup>          | -0.40                                         |
| MAL         | mal, T cell differentiation protein                                   | 8.45 x 10 <sup>-4</sup>          | -0.40                                         |
| MID2        | midline 2                                                             | 8.45 x 10 <sup>-4</sup>          | -0.40                                         |
| CTR9        | CTR9 homolog, Paf1/RNA polymerase II complex component                | 8.53 x 10 <sup>-4</sup>          | -0.40                                         |
| FAM160B2    | family with sequence similarity 160 member B2                         | 8.56 x 10 <sup>-4</sup>          | -0.40                                         |

| Gene Symbol | Gene Name                                                  | P value<br>(FDR-adjusted) | r (partial correlation<br>coefficient) |
|-------------|------------------------------------------------------------|---------------------------|----------------------------------------|
| NOB1        | NIN1 (RPN12) binding protein 1 homolog                     | 8.65 x 10 <sup>-4</sup>   | -0.40                                  |
| KLHL6       | kelch like family member 6                                 | 8.66 x 10 <sup>-4</sup>   | -0.40                                  |
| MRM2        | mitochondrial rRNA methyltransferase 2                     | 8.68 x 10 <sup>-4</sup>   | -0.40                                  |
| VSIG1       | V-set and immunoglobulin domain containing 1               | 8.72 x 10 <sup>-4</sup>   | -0.40                                  |
| YTHDC2      | YTH domain containing 2                                    | 8.73 x 10 <sup>-4</sup>   | -0.40                                  |
| CENPO       | centromere protein O                                       | 8.79 x 10 <sup>-4</sup>   | -0.40                                  |
| ST6GAL1     | ST6 beta-galactoside alpha-2,6-sialyltransferase 1         | 8.87 x 10 <sup>-4</sup>   | -0.40                                  |
| CCT7        | chaperonin containing TCP1 subunit 7                       | 9.04 x 10 <sup>-4</sup>   | -0.40                                  |
| GEMIN4      | gem nuclear organelle associated protein 4                 | 9.08 x 10 <sup>-4</sup>   | -0.40                                  |
| ELP2        | elongator acetyltransferase complex subunit 2              | 9.10 x 10 <sup>-4</sup>   | -0.40                                  |
| SREBF2      | sterol regulatory element binding transcription factor 2   | 9.14 x 10 <sup>-4</sup>   | -0.40                                  |
| KCTD7       | potassium channel tetramerization domain containing 7      | 9.15 x 10 <sup>-4</sup>   | -0.40                                  |
| PDIA3       | protein disulfide isomerase family A member 3              | 9.18 x 10 <sup>-4</sup>   | -0.40                                  |
| PLA1A       | phospholipase A1 member A                                  | 9.19 x 10 <sup>-4</sup>   | -0.40                                  |
| XPO5        | exportin 5                                                 | 9.24 x 10 <sup>-4</sup>   | -0.40                                  |
| ZNF395      | zinc finger protein 395                                    | 9.29 x 10 <sup>-4</sup>   | -0.40                                  |
| HSP90B1     | heat shock protein 90 beta family member 1                 | 9.30 x 10 <sup>-4</sup>   | -0.40                                  |
| ADCY3       | adenylate cyclase 3                                        | 9.43 x 10 <sup>-4</sup>   | -0.40                                  |
| AQP3        | aquaporin 3 (Gill blood group)                             | 9.43 x 10 <sup>-4</sup>   | -0.40                                  |
| SLC18B1     | solute carrier family 18 member B1                         | 9.48 x 10 <sup>-4</sup>   | -0.40                                  |
| MIPEP       | mitochondrial intermediate peptidase                       | 9.49 x 10 <sup>-4</sup>   | -0.40                                  |
| CAND2       | cullin associated and neddylation dissociated 2 (putative) | 9.59 x 10 <sup>-4</sup>   | -0.40                                  |
| KMO         | kynurenine 3-monooxygenase                                 | 9.63 x 10 <sup>-4</sup>   | -0.40                                  |
| RPL32       | ribosomal protein L32                                      | 9.64 x 10 <sup>-4</sup>   | -0.40                                  |
| C5orf63     | chromosome 5 open reading frame 63                         | 9.68 x 10 <sup>-4</sup>   | -0.40                                  |
| DDHD2       | DDHD domain containing 2                                   | 9.71 x 10 <sup>-4</sup>   | -0.40                                  |
| LONP1       | lon peptidase 1, mitochondrial                             | 9.76 x 10 <sup>-4</sup>   | -0.40                                  |
| BDH1        | 3-hydroxybutyrate dehydrogenase 1                          | 9.77 x 10 <sup>-4</sup>   | -0.40                                  |
| HNRNPDL     | heterogeneous nuclear ribonucleoprotein D like             | 9.77 x 10 <sup>-4</sup>   | -0.40                                  |
| ATP10A      | ATPase phospholipid transporting 10A (putative)            | 9.82 x 10 <sup>-4</sup>   | -0.40                                  |
| DIS3L       | DIS3 like exosome 3'-5' exoribonuclease                    | 9.83 x 10 <sup>-4</sup>   | -0.40                                  |
| ZNF514      | zinc finger protein 514                                    | 9.86 x 10 <sup>-4</sup>   | -0.40                                  |
| ZFYVE9      | zinc finger FYVE-type containing 9                         | 9.89 x 10 <sup>-4</sup>   | -0.40                                  |
| PLCG1       | phospholipase C gamma 1                                    | 9.91 x 10 <sup>-4</sup>   | -0.40                                  |
| RPL22       | ribosomal protein L22                                      | 1.00 x 10 <sup>-3</sup>   | -0.40                                  |
| NMT2        | N-myristoyltransferase 2                                   | 1.00 x 10 <sup>-3</sup>   | -0.40                                  |

| Gene Symbol | Gene Name                                                           | <i>P</i> value<br>(FDR-adjusted) | <i>r</i> (partial correlation<br>coefficient) |
|-------------|---------------------------------------------------------------------|----------------------------------|-----------------------------------------------|
| SLC30A4     | solute carrier family 30 member 4                                   | 1.01 x 10 <sup>-3</sup>          | -0.40                                         |
| ZNF329      | zinc finger protein 329                                             | 1.01 x 10 <sup>-3</sup>          | -0.40                                         |
| ADCK2       | aarF domain containing kinase 2                                     | 1.02 x 10 <sup>-3</sup>          | -0.40                                         |
| ERCC6L2     | ERCC excision repair 6 like 2                                       | 1.02 x 10 <sup>-3</sup>          | -0.40                                         |
| CD6         | CD6 molecule                                                        | 1.03 x 10 <sup>-3</sup>          | -0.40                                         |
| PCNX2       | pecanex 2                                                           | 1.03 x 10 <sup>-3</sup>          | -0.40                                         |
| ZNF783      | zinc finger family member 783                                       | 1.04 x 10 <sup>-3</sup>          | -0.40                                         |
| MOB3B       | MOB kinase activator 3B                                             | 1.05 x 10 <sup>-3</sup>          | -0.39                                         |
| PARP1       | poly(ADP-ribose) polymerase 1                                       | 1.07 x 10 <sup>-3</sup>          | -0.39                                         |
| WNT16       | Wnt family member 16                                                | 1.07 x 10 <sup>-3</sup>          | -0.39                                         |
| ZBTB20      | zinc finger and BTB domain containing 20                            | 1.07 x 10 <sup>-3</sup>          | -0.39                                         |
| BCL2        | BCL2 apoptosis regulator                                            | 1.08 x 10 <sup>-3</sup>          | -0.39                                         |
| BTRC        | beta-transducin repeat containing E3 ubiquitin protein ligase       | 1.08 x 10 <sup>-3</sup>          | -0.39                                         |
| WDR78       | WD repeat domain 78                                                 | 1.08 x 10 <sup>-3</sup>          | -0.39                                         |
| EEF2        | eukaryotic translation elongation factor 2                          | 1.09 x 10 <sup>-3</sup>          | -0.39                                         |
| KCNG1       | potassium voltage-gated channel modifier subfamily G member 1       | 1.09 x 10 <sup>-3</sup>          | -0.39                                         |
| STMN3       | stathmin 3                                                          | 1.09 x 10 <sup>-3</sup>          | -0.39                                         |
| USP6NL      | USP6 N-terminal like                                                | 1.09 x 10 <sup>-3</sup>          | -0.39                                         |
| LAMC1       | laminin subunit gamma 1                                             | 1.10 x 10 <sup>-3</sup>          | -0.39                                         |
| HSPD1       | heat shock protein family D (Hsp60) member 1                        | 1.12 x 10 <sup>-3</sup>          | -0.39                                         |
| ATP6V0E2    | ATPase H <sup>+</sup> transporting V0 subunit e2                    | 1.13 x 10 <sup>-3</sup>          | -0.39                                         |
| IRS1        | insulin receptor substrate 1                                        | 1.13 x 10 <sup>-3</sup>          | -0.39                                         |
| SDHAP1      | succinate dehydrogenase complex flavoprotein subunit A pseudogene 1 | 1.14 x 10 <sup>-3</sup>          | -0.39                                         |
| ENAH        | ENAH actin regulator                                                | 1.15 x 10 <sup>-3</sup>          | -0.39                                         |
| ITK         | IL2 inducible T cell kinase                                         | 1.15 x 10 <sup>-3</sup>          | -0.39                                         |
| LTA         | lymphotoxin alpha                                                   | 1.15 x 10 <sup>-3</sup>          | -0.39                                         |
| CDC25B      | cell division cycle 25B                                             | 1.17 x 10 <sup>-3</sup>          | -0.39                                         |
| LRBA        | LPS responsive beige-like anchor protein                            | 1.17 x 10 <sup>-3</sup>          | -0.39                                         |
| METTL16     | methyltransferase like 16                                           | 1.17 x 10 <sup>-3</sup>          | -0.39                                         |
| MTERF4      | mitochondrial transcription termination factor 4                    | 1.17 x 10 <sup>-3</sup>          | -0.39                                         |
| TRMT1       | tRNA methyltransferase 1                                            | 1.17 x 10 <sup>-3</sup>          | -0.39                                         |
| ZNF285      | zinc finger protein 285                                             | 1.17 x 10 <sup>-3</sup>          | -0.39                                         |
| LNPEP       | leucyl and cystinyl aminopeptidase                                  | 1.18 x 10 <sup>-3</sup>          | -0.39                                         |
| TTC12       | tetratricopeptide repeat domain 12                                  | 1.18 x 10 <sup>-3</sup>          | -0.39                                         |
| TIMELESS    | timeless circadian regulator                                        | 1.19 x 10 <sup>-3</sup>          | -0.39                                         |
| ESYT2       | extended synaptotagmin 2                                            | 1.19 x 10 <sup>-3</sup>          | -0.39                                         |

| Gene Symbol | Gene Name                                                            | <i>P</i> value<br>(FDR-adjusted) | <i>r</i> (partial correlation<br>coefficient) |
|-------------|----------------------------------------------------------------------|----------------------------------|-----------------------------------------------|
| TCEAL3      | transcription elongation factor A like 3                             | 1.21 x 10 <sup>-3</sup>          | -0.39                                         |
| SEH1L       | SEH1 like nucleoporin                                                | 1.22 x 10 <sup>-3</sup>          | -0.39                                         |
| USP34       | ubiquitin specific peptidase 34                                      | 1.22 x 10 <sup>-3</sup>          | -0.39                                         |
| UXS1        | UDP-glucuronate decarboxylase 1                                      | 1.22 x 10 <sup>-3</sup>          | -0.39                                         |
| ZNF532      | zinc finger protein 532                                              | 1.22 x 10 <sup>-3</sup>          | -0.39                                         |
| CLNK        | cytokine dependent hematopoietic cell linker                         | 1.23 x 10 <sup>-3</sup>          | -0.39                                         |
| FTSJ3       | FtsJ RNA 2'-O-methyltransferase 3                                    | 1.24 x 10 <sup>-3</sup>          | -0.39                                         |
| ZNF793      | zinc finger protein 793                                              | 1.24 x 10 <sup>-3</sup>          | -0.39                                         |
| ETS1        | ETS proto-oncogene 1, transcription factor                           | 1.25 x 10 <sup>-3</sup>          | -0.39                                         |
| DHFR2       | dihydrofolate reductase 2                                            | 1.26 x 10 <sup>-3</sup>          | -0.39                                         |
| PPM1K       | protein phosphatase, Mg <sup>2+</sup> /Mn <sup>2+</sup> dependent 1K | 1.26 x 10 <sup>-3</sup>          | -0.39                                         |
| LARS2       | leucyl-tRNA synthetase 2, mitochondrial                              | 1.27 x 10 <sup>-3</sup>          | -0.39                                         |
| MATN1-AS1   | MATN1 antisense RNA 1                                                | 1.28 x 10 <sup>-3</sup>          | -0.39                                         |
| NBAS        | neuroblastoma amplified sequence                                     | 1.28 x 10 <sup>-3</sup>          | -0.39                                         |
| PDHA1       | pyruvate dehydrogenase E1 alpha 1 subunit                            | 1.28 x 10 <sup>-3</sup>          | -0.39                                         |
| SLC9A7      | solute carrier family 9 member A7                                    | 1.29 x 10 <sup>-3</sup>          | -0.39                                         |
| IGSF11      | immunoglobulin superfamily member 11                                 | 1.29 x 10 <sup>-3</sup>          | -0.39                                         |
| BTNL9       | butyrophilin like 9                                                  | 1.30 x 10 <sup>-3</sup>          | -0.39                                         |
| SLC7A1      | solute carrier family 7 member 1                                     | 1.30 x 10 <sup>-3</sup>          | -0.39                                         |
| PIK3IP1     | phosphoinositide-3-kinase interacting protein 1                      | 1.31 x 10 <sup>-3</sup>          | -0.39                                         |
| UBE2I       | ubiquitin conjugating enzyme E2 I                                    | 1.31 x 10 <sup>-3</sup>          | -0.39                                         |
| GCN1        | GCN1, eIF2 alpha kinase activator homolog                            | 1.32 x 10 <sup>-3</sup>          | -0.39                                         |
| CD27        | CD27 molecule                                                        | 1.33 x 10 <sup>-3</sup>          | -0.39                                         |
| RPS28       | ribosomal protein S28                                                | 1.33 x 10 <sup>-3</sup>          | -0.39                                         |
| RRP15       | ribosomal RNA processing 15 homolog                                  | 1.33 x 10 <sup>-3</sup>          | -0.39                                         |
| SIDT1       | SID1 transmembrane family member 1                                   | 1.34 x 10 <sup>-3</sup>          | -0.39                                         |
| SIX3        | SIX homeobox 3                                                       | 1.34 x 10 <sup>-3</sup>          | -0.39                                         |
| VARS        | valyl-tRNA synthetase                                                | 1.34 x 10 <sup>-3</sup>          | -0.39                                         |
| GPR183      | G protein-coupled receptor 183                                       | 1.35 x 10 <sup>-3</sup>          | -0.39                                         |
| TMEM203     | transmembrane protein 203                                            | 1.35 x 10 <sup>-3</sup>          | -0.39                                         |
| ALMS1       | ALMS1 centrosome and basal body associated protein                   | 1.35 x 10 <sup>-3</sup>          | -0.39                                         |
| COX20       | cytochrome c oxidase assembly factor COX20                           | 1.35 x 10 <sup>-3</sup>          | -0.39                                         |
| ELP1        | elongator complex protein 1                                          | 1.35 x 10 <sup>-3</sup>          | -0.39                                         |
| DAB1        | DAB adaptor protein 1                                                | 1.37 x 10 <sup>-3</sup>          | -0.39                                         |
| ZNF165      | zinc finger protein 165                                              | 1.38 x 10 <sup>-3</sup>          | -0.39                                         |
| CMSS1       | cms1 ribosomal small subunit homolog                                 | 1.38 x 10 <sup>-3</sup>          | -0.39                                         |

| Gene Symbol | Gene Name                                                | <i>P</i> value<br>(FDR-adjusted) | <i>r</i> (partial correlation<br>coefficient) |
|-------------|----------------------------------------------------------|----------------------------------|-----------------------------------------------|
| ZNF691      | zinc finger protein 691                                  | 1.38 x 10 <sup>-3</sup>          | -0.39                                         |
| MAP2        | microtubule associated protein 2                         | 1.39 x 10 <sup>-3</sup>          | -0.39                                         |
| SLC25A23    | solute carrier family 25 member 23                       | 1.39 x 10 <sup>-3</sup>          | -0.39                                         |
| AMIGO1      | adhesion molecule with Ig like domain 1                  | 1.40 x 10 <sup>-3</sup>          | -0.39                                         |
| ATPAF1      | ATP synthase mitochondrial F1 complex assembly factor 1  | 1.40 x 10 <sup>-3</sup>          | -0.39                                         |
| DOCK9-DT    | DOCK9 divergent transcript                               | 1.40 x 10 <sup>-3</sup>          | -0.39                                         |
| TTC9        | tetratricopeptide repeat domain 9                        | 1.42 x 10 <sup>-3</sup>          | -0.39                                         |
| ZNF343      | zinc finger protein 343                                  | 1.42 x 10 <sup>-3</sup>          | -0.39                                         |
| BEND5       | BEN domain containing 5                                  | 1.43 x 10 <sup>-3</sup>          | -0.39                                         |
| PWP1        | PWP1 homolog, endonuclein                                | 1.43 x 10 <sup>-3</sup>          | -0.39                                         |
| KDSR        | 3-ketodihydrosphingosine reductase                       | 1.44 x 10 <sup>-3</sup>          | -0.38                                         |
| TADA2A      | transcriptional adaptor 2A                               | 1.44 x 10 <sup>-3</sup>          | -0.38                                         |
| TRIP10      | thyroid hormone receptor interactor 10                   | 1.44 x 10 <sup>-3</sup>          | -0.38                                         |
| SCML4       | Scm polycomb group protein like 4                        | 1.45 x 10 <sup>-3</sup>          | -0.38                                         |
| KAT2A       | lysine acetyltransferase 2A                              | 1.46 x 10 <sup>-3</sup>          | -0.38                                         |
| TCL6        | T cell leukemia/lymphoma 6                               | 1.47 x 10 <sup>-3</sup>          | -0.38                                         |
| PJKV        | pejvakin                                                 | 1.48 x 10 <sup>-3</sup>          | -0.38                                         |
| ATMIN       | ATM interactor                                           | 1.48 x 10 <sup>-3</sup>          | -0.38                                         |
| ZNF416      | zinc finger protein 416                                  | 1.48 x 10 <sup>-3</sup>          | -0.38                                         |
| CYP2U1      | cytochrome P450 family 2 subfamily U member 1            | 1.49 x 10 <sup>-3</sup>          | -0.38                                         |
| TCL1A       | T cell leukemia/lymphoma 1A                              | 1.49 x 10 <sup>-3</sup>          | -0.38                                         |
| PIGO        | phosphatidylinositol glycan anchor biosynthesis class O  | 1.50 x 10 <sup>-3</sup>          | -0.38                                         |
| PCM1        | pericentriolar material 1                                | 1.51 x 10 <sup>-3</sup>          | -0.38                                         |
| TUB         | tubby bipartite transcription factor                     | 1.51 x 10 <sup>-3</sup>          | -0.38                                         |
| GJB6        | gap junction protein beta 6                              | 1.52 x 10 <sup>-3</sup>          | -0.38                                         |
| SART3       | spliceosome associated factor 3, U4/U6 recycling protein | 1.53 x 10 <sup>-3</sup>          | -0.38                                         |
| MORC4       | MORC family CW-type zinc finger 4                        | 1.54 x 10 <sup>-3</sup>          | -0.38                                         |
| TRMT44      | tRNA methyltransferase 44 homolog                        | 1.54 x 10 <sup>-3</sup>          | -0.38                                         |
| POLR3A      | RNA polymerase III subunit A                             | 1.56 x 10 <sup>-3</sup>          | -0.38                                         |
| CRIP3       | cysteine rich protein 3                                  | 1.57 x 10 <sup>-3</sup>          | -0.38                                         |
| SLC6A16     | solute carrier family 6 member 16                        | 1.57 x 10 <sup>-3</sup>          | -0.38                                         |
| FIZ1        | FLT3 interacting zinc finger 1                           | 1.58 x 10 <sup>-3</sup>          | -0.38                                         |
| NUMA1       | nuclear mitotic apparatus protein 1                      | 1.58 x 10 <sup>-3</sup>          | -0.38                                         |
| UBIAD1      | UbiA prenyltransferase domain containing 1               | 1.58 x 10 <sup>-3</sup>          | -0.38                                         |
| ARHGAP5     | Rho GTPase activating protein 5                          | 1.60 x 10 <sup>-3</sup>          | -0.38                                         |
| HNRNPA3     | heterogeneous nuclear ribonucleoprotein A3               | 1.60 x 10 <sup>-3</sup>          | -0.38                                         |

| Gene Symbol | Gene Name                                                      | P value<br>(FDR-adjusted) | r (partial correlation<br>coefficient) |
|-------------|----------------------------------------------------------------|---------------------------|----------------------------------------|
| LINC01342   | long intergenic non-protein coding RNA 1342                    | 1.60 x 10 <sup>-3</sup>   | -0.38                                  |
| CTPS2       | CTP synthase 2                                                 | 1.61 x 10 <sup>-3</sup>   | -0.38                                  |
| DNAAF5      | dynein axonemal assembly factor 5                              | 1.61 x 10 <sup>-3</sup>   | -0.38                                  |
| HACD3       | 3-hydroxyacyl-CoA dehydratase 3                                | 1.61 x 10 <sup>-3</sup>   | -0.38                                  |
| UQCC1       | ubiquinol-cytochrome c reductase complex assembly factor 1     | 1.63 x 10 <sup>-3</sup>   | -0.38                                  |
| DNMT1       | DNA methyltransferase 1                                        | 1.65 x 10 <sup>-3</sup>   | -0.38                                  |
| PAQR8       | progesterin and adipoQ receptor family member 8                | 1.65 x 10 <sup>-3</sup>   | -0.38                                  |
| EIF5B       | eukaryotic translation initiation factor 5B                    | 1.66 x 10 <sup>-3</sup>   | -0.38                                  |
| NCAPG2      | non-SMC condensin II complex subunit G2                        | 1.66 x 10 <sup>-3</sup>   | -0.38                                  |
| CD28        | CD28 molecule                                                  | 1.67 x 10 <sup>-3</sup>   | -0.38                                  |
| SEC31A      | SEC31 homolog A, COPII coat complex component                  | 1.67 x 10 <sup>-3</sup>   | -0.38                                  |
| TMED10      | transmembrane p24 trafficking protein 10                       | 1.67 x 10 <sup>-3</sup>   | -0.38                                  |
| SHISA8      | shisa family member 8                                          | 1.69 x 10 <sup>-3</sup>   | -0.38                                  |
| ATP1A1-AS1  | ATP1A1 antisense RNA 1                                         | 1.70 x 10 <sup>-3</sup>   | -0.38                                  |
| FADS3       | fatty acid desaturase 3                                        | 1.70 x 10 <sup>-3</sup>   | -0.38                                  |
| LRCH1       | leucine rich repeats and calponin homology domain containing 1 | 1.70 x 10 <sup>-3</sup>   | -0.38                                  |
| DYRK2       | dual specificity tyrosine phosphorylation regulated kinase 2   | 1.71 x 10 <sup>-3</sup>   | -0.38                                  |
| NELFCD      | negative elongation factor complex member C/D                  | 1.71 x 10 <sup>-3</sup>   | -0.38                                  |
| LDAH        | lipid droplet associated hydrolase                             | 1.72 x 10 <sup>-3</sup>   | -0.38                                  |
| NHP2        | NHP2 ribonucleoprotein                                         | 1.73 x 10 <sup>-3</sup>   | -0.38                                  |
| ARMH3       | armadillo-like helical domain containing 3                     | 1.75 x 10 <sup>-3</sup>   | -0.38                                  |
| LEF1-AS1    | LEF1 antisense RNA 1                                           | 1.76 x 10 <sup>-3</sup>   | -0.38                                  |
| CD83        | CD83 molecule                                                  | 1.76 x 10 <sup>-3</sup>   | -0.38                                  |
| NUP133      | nucleoporin 133                                                | 1.76 x 10 <sup>-3</sup>   | -0.38                                  |
| TCF12       | transcription factor 12                                        | 1.76 x 10 <sup>-3</sup>   | -0.38                                  |
| SEMA6A      | semaphorin 6A                                                  | 1.78 x 10 <sup>-3</sup>   | -0.38                                  |
| ABHD14B     | abhydrolase domain containing 14B                              | 1.79 x 10 <sup>-3</sup>   | -0.38                                  |
| BTLA        | B and T lymphocyte associated                                  | 1.80 x 10 <sup>-3</sup>   | -0.38                                  |
| C12orf66    | chromosome 12 open reading frame 66                            | 1.81 x 10 <sup>-3</sup>   | -0.38                                  |
| RBM26-AS1   | RBM26 antisense RNA 1                                          | 1.81 x 10 <sup>-3</sup>   | -0.38                                  |
| SEMA4F      | semaphorin 4F                                                  | 1.81 x 10 <sup>-3</sup>   | -0.38                                  |
| FAM102A     | family with sequence similarity 102 member A                   | 1.82 x 10 <sup>-3</sup>   | -0.38                                  |
| TTC39C      | tetratricopeptide repeat domain 39C                            | 1.82 x 10 <sup>-3</sup>   | -0.38                                  |
| IGSF8       | immunoglobulin superfamily member 8                            | 1.83 x 10 <sup>-3</sup>   | -0.38                                  |
| EMG1        | EMG1 N1-specific pseudouridine methyltransferase               | 1.85 x 10 <sup>-3</sup>   | -0.38                                  |
| SESN1       | sestrin 1                                                      | 1.85 x 10 <sup>-3</sup>   | -0.38                                  |

| Gene Symbol | Gene Name                                                          | <i>P</i> value<br>(FDR-adjusted) | <i>r</i> (partial correlation<br>coefficient) |
|-------------|--------------------------------------------------------------------|----------------------------------|-----------------------------------------------|
| C2orf81     | chromosome 2 open reading frame 81                                 | 1.86 x 10 <sup>-3</sup>          | -0.38                                         |
| ELOVL4      | ELOVL fatty acid elongase 4                                        | 1.86 x 10 <sup>-3</sup>          | -0.38                                         |
| ZNF84       | zinc finger protein 84                                             | 1.86 x 10 <sup>-3</sup>          | -0.38                                         |
| FITM2       | fat storage inducing transmembrane protein 2                       | 1.87 x 10 <sup>-3</sup>          | -0.38                                         |
| TRIM32      | tripartite motif containing 32                                     | 1.88 x 10 <sup>-3</sup>          | -0.38                                         |
| SLC9B2      | solute carrier family 9 member B2                                  | 1.89 x 10 <sup>-3</sup>          | -0.38                                         |
| PPP4R3B     | protein phosphatase 4 regulatory subunit 3B                        | 1.90 x 10 <sup>-3</sup>          | -0.38                                         |
| RTL10       | retrotransposon Gag like 10                                        | 1.91 x 10 <sup>-3</sup>          | -0.38                                         |
| ABI2        | abl interactor 2                                                   | 1.92 x 10 <sup>-3</sup>          | -0.38                                         |
| C12orf49    | chromosome 12 open reading frame 49                                | 1.92 x 10 <sup>-3</sup>          | -0.38                                         |
| ANKRD13C    | ankyrin repeat domain 13C                                          | 1.93 x 10 <sup>-3</sup>          | -0.38                                         |
| FAM161A     | FAM161 centrosomal protein A                                       | 1.94 x 10 <sup>-3</sup>          | -0.38                                         |
| LINC00665   | long intergenic non-protein coding RNA 665                         | 1.94 x 10 <sup>-3</sup>          | -0.38                                         |
| DDX24       | DEAD-box helicase 24                                               | 1.95 x 10 <sup>-3</sup>          | -0.38                                         |
| ZNF667      | zinc finger protein 667                                            | 1.95 x 10 <sup>-3</sup>          | -0.37                                         |
| FXVD7       | FXVD domain containing ion transport regulator 7                   | 1.96 x 10 <sup>-3</sup>          | -0.37                                         |
| ZDHHC11     | zinc finger DHHC-type containing 11                                | 1.96 x 10 <sup>-3</sup>          | -0.37                                         |
| NUP188      | nucleoporin 188                                                    | 1.97 x 10 <sup>-3</sup>          | -0.37                                         |
| TSPAN3      | tetraspanin 3                                                      | 1.97 x 10 <sup>-3</sup>          | -0.37                                         |
| PCYOX1      | prenylcysteine oxidase 1                                           | 1.98 x 10 <sup>-3</sup>          | -0.37                                         |
| KHDRBS2     | KH RNA binding domain containing, signal transduction associated 2 | 1.99 x 10 <sup>-3</sup>          | -0.37                                         |
| CYP2J2      | cytochrome P450 family 2 subfamily J member 2                      | 1.99 x 10 <sup>-3</sup>          | -0.37                                         |
| MFHAS1      | malignant fibrous histiocytoma amplified sequence 1                | 2.00 x 10 <sup>-3</sup>          | -0.37                                         |
| MRPL35      | mitochondrial ribosomal protein L35                                | 2.01 x 10 <sup>-3</sup>          | -0.37                                         |
| RBBP7       | RB binding protein 7, chromatin remodeling factor                  | 2.02 x 10 <sup>-3</sup>          | -0.37                                         |
| TMEM156     | transmembrane protein 156                                          | 2.03 x 10 <sup>-3</sup>          | -0.37                                         |
| RASA3       | RAS p21 protein activator 3                                        | 2.03 x 10 <sup>-3</sup>          | -0.37                                         |
| ZNF263      | zinc finger protein 263                                            | 2.03 x 10 <sup>-3</sup>          | -0.37                                         |
| VMA21       | vacuolar ATPase assembly factor VMA21                              | 2.06 x 10 <sup>-3</sup>          | -0.37                                         |
| SPAG16      | sperm associated antigen 16                                        | 2.08 x 10 <sup>-3</sup>          | -0.37                                         |
| SPATA5      | spermatogenesis associated 5                                       | 2.08 x 10 <sup>-3</sup>          | -0.37                                         |
| RABGEF1     | RAB guanine nucleotide exchange factor 1                           | 2.10 x 10 <sup>-3</sup>          | -0.37                                         |
| GPATCH4     | G-patch domain containing 4                                        | 2.11 x 10 <sup>-3</sup>          | -0.37                                         |
| TRAV12-2    | T cell receptor alpha variable 12-2                                | 2.11 x 10 <sup>-3</sup>          | -0.37                                         |
| PAN2        | poly(A) specific ribonuclease subunit PAN2                         | 2.12 x 10 <sup>-3</sup>          | -0.37                                         |
| DMD         | dystrophin                                                         | 2.15 x 10 <sup>-3</sup>          | -0.37                                         |

| Gene Symbol | Gene Name                                                                                       | P value<br>(FDR-adjusted) | r (partial correlation<br>coefficient) |
|-------------|-------------------------------------------------------------------------------------------------|---------------------------|----------------------------------------|
| PASK        | PAS domain containing serine/threonine kinase                                                   | 2.15 x 10 <sup>-3</sup>   | -0.37                                  |
| IARS2       | isoleucyl-tRNA synthetase 2, mitochondrial                                                      | 2.16 x 10 <sup>-3</sup>   | -0.37                                  |
| RPS23       | ribosomal protein S23                                                                           | 2.16 x 10 <sup>-3</sup>   | -0.37                                  |
| LGMN        | legumain                                                                                        | 2.18 x 10 <sup>-3</sup>   | -0.37                                  |
| ZNF121      | zinc finger protein 121                                                                         | 2.19 x 10 <sup>-3</sup>   | -0.37                                  |
| ADAMTS6     | ADAM metalloproteinase with thrombospondin type 1 motif 6                                       | 2.20 x 10 <sup>-3</sup>   | -0.37                                  |
| CMTM8       | CKLF like MARVEL transmembrane domain containing 8                                              | 2.20 x 10 <sup>-3</sup>   | -0.37                                  |
| MTHFD1      | methylenetetrahydrofolate dehydrogenase, cyclohydrolase and formyltetrahydrofolate synthetase 1 | 2.20 x 10 <sup>-3</sup>   | -0.37                                  |
| CYCS        | cytochrome c, somatic                                                                           | 2.21 x 10 <sup>-3</sup>   | -0.37                                  |
| TRAF5       | TNF receptor associated factor 5                                                                | 2.23 x 10 <sup>-3</sup>   | -0.37                                  |
| MIEF1       | mitochondrial elongation factor 1                                                               | 2.24 x 10 <sup>-3</sup>   | -0.37                                  |
| ADAM28      | ADAM metalloproteinase domain 28                                                                | 2.25 x 10 <sup>-3</sup>   | -0.37                                  |
| TCF7        | transcription factor 7                                                                          | 2.25 x 10 <sup>-3</sup>   | -0.37                                  |
| PTPN13      | protein tyrosine phosphatase, non-receptor type 13                                              | 2.26 x 10 <sup>-3</sup>   | -0.37                                  |
| BOC         | BOC cell adhesion associated, oncogene regulated                                                | 2.30 x 10 <sup>-3</sup>   | -0.37                                  |
| NOA1        | nitric oxide associated 1                                                                       | 2.30 x 10 <sup>-3</sup>   | -0.37                                  |
| TOMM70      | translocase of outer mitochondrial membrane 70                                                  | 2.30 x 10 <sup>-3</sup>   | -0.37                                  |
| ZNF813      | zinc finger protein 813                                                                         | 2.30 x 10 <sup>-3</sup>   | -0.37                                  |
| DBNDD1      | dysbindin domain containing 1                                                                   | 2.31 x 10 <sup>-3</sup>   | -0.37                                  |
| SFMBT1      | Scm like with four mbt domains 1                                                                | 2.32 x 10 <sup>-3</sup>   | -0.37                                  |
| SH2D3A      | SH2 domain containing 3A                                                                        | 2.32 x 10 <sup>-3</sup>   | -0.37                                  |
| TCEAL4      | transcription elongation factor A like 4                                                        | 2.33 x 10 <sup>-3</sup>   | -0.37                                  |
| NEK8        | NIMA related kinase 8                                                                           | 2.33 x 10 <sup>-3</sup>   | -0.37                                  |
| HNRNPA0     | heterogeneous nuclear ribonucleoprotein A0                                                      | 2.35 x 10 <sup>-3</sup>   | -0.37                                  |
| PEX14       | peroxisomal biogenesis factor 14                                                                | 2.35 x 10 <sup>-3</sup>   | -0.37                                  |
| CSTF3       | cleavage stimulation factor subunit 3                                                           | 2.37 x 10 <sup>-3</sup>   | -0.37                                  |
| EHMT2       | euchromatic histone lysine methyltransferase 2                                                  | 2.39 x 10 <sup>-3</sup>   | -0.37                                  |
| DNAJC11     | DnaJ heat shock protein family (Hsp40) member C11                                               | 2.40 x 10 <sup>-3</sup>   | -0.37                                  |
| CFAP97      | cilia and flagella associated protein 97                                                        | 2.41 x 10 <sup>-3</sup>   | -0.37                                  |
| PJA1        | praja ring finger ubiquitin ligase 1                                                            | 2.43 x 10 <sup>-3</sup>   | -0.37                                  |
| RIC3        | RIC3 acetylcholine receptor chaperone                                                           | 2.43 x 10 <sup>-3</sup>   | -0.37                                  |
| EEF1G       | eukaryotic translation elongation factor 1 gamma                                                | 2.44 x 10 <sup>-3</sup>   | -0.37                                  |
| RUVBL1      | RuvB like AAA ATPase 1                                                                          | 2.45 x 10 <sup>-3</sup>   | -0.37                                  |
| WASHC5      | WASH complex subunit 5                                                                          | 2.45 x 10 <sup>-3</sup>   | -0.37                                  |
| RNF157      | ring finger protein 157                                                                         | 2.46 x 10 <sup>-3</sup>   | -0.37                                  |



| Gene Symbol | Gene Name                                                           | <i>P</i> value<br>(FDR-adjusted) | <i>r</i> (partial correlation<br>coefficient) |
|-------------|---------------------------------------------------------------------|----------------------------------|-----------------------------------------------|
| ACACA       | acetyl-CoA carboxylase alpha                                        | 2.47 x 10 <sup>-3</sup>          | -0.37                                         |
| POLA1       | DNA polymerase alpha 1, catalytic subunit                           | 2.47 x 10 <sup>-3</sup>          | -0.37                                         |
| ATP1A1      | ATPase Na <sup>+</sup> /K <sup>+</sup> transporting subunit alpha 1 | 2.48 x 10 <sup>-3</sup>          | -0.37                                         |
| MSTO1       | misato mitochondrial distribution and morphology regulator 1        | 2.48 x 10 <sup>-3</sup>          | -0.37                                         |
| LGALS8      | galectin 8                                                          | 2.49 x 10 <sup>-3</sup>          | -0.37                                         |
| SAMM50      | SAMM50 sorting and assembly machinery component                     | 2.49 x 10 <sup>-3</sup>          | -0.37                                         |
| SLC27A5     | solute carrier family 27 member 5                                   | 2.49 x 10 <sup>-3</sup>          | -0.37                                         |
| ZCCHC7      | zinc finger CCHC-type containing 7                                  | 2.52 x 10 <sup>-3</sup>          | -0.37                                         |
| NSG1        | neuronal vesicle trafficking associated 1                           | 2.52 x 10 <sup>-3</sup>          | -0.37                                         |
| TLCD2       | TLC domain containing 2                                             | 2.54 x 10 <sup>-3</sup>          | -0.37                                         |
| PFN2        | profilin 2                                                          | 2.56 x 10 <sup>-3</sup>          | -0.37                                         |
| SLC2A11     | solute carrier family 2 member 11                                   | 2.56 x 10 <sup>-3</sup>          | -0.37                                         |

## B Genes that increase expression with age

| Gene Symbol | Gene Name                                                               | <i>P</i> value<br>(FDR-adjusted) | <i>r</i> (partial correlation<br>coefficient) |
|-------------|-------------------------------------------------------------------------|----------------------------------|-----------------------------------------------|
| LATS2       | large tumor suppressor kinase 2                                         | 3.67 x 10 <sup>-6</sup>          | 0.54                                          |
| CD46        | CD46 molecule                                                           | 1.23 x 10 <sup>-5</sup>          | 0.51                                          |
| TNFAIP2     | TNF alpha induced protein 2                                             | 1.52 x 10 <sup>-5</sup>          | 0.51                                          |
| LST1        | leukocyte specific transcript 1                                         | 2.67 x 10 <sup>-5</sup>          | 0.49                                          |
| SPTB        | spectrin beta, erythrocytic                                             | 3.42 x 10 <sup>-5</sup>          | 0.49                                          |
| WIPI1       | WD repeat domain, phosphoinositide interacting 1                        | 3.47 x 10 <sup>-5</sup>          | 0.49                                          |
| CAPNS2      | calpain small subunit 2                                                 | 3.52 x 10 <sup>-5</sup>          | 0.49                                          |
| TPM3        | tropomyosin 3                                                           | 3.83 x 10 <sup>-5</sup>          | 0.48                                          |
| RFFL        | ring finger and FYVE like domain containing E3 ubiquitin protein ligase | 3.93 x 10 <sup>-5</sup>          | 0.48                                          |
| ARAP1       | ArfGAP with RhoGAP domain, ankyrin repeat and PH domain 1               | 3.95 x 10 <sup>-5</sup>          | 0.48                                          |
| KIRREL3     | kirre like nephrin family adhesion molecule 3                           | 4.30 x 10 <sup>-5</sup>          | 0.48                                          |
| APC         | APC regulator of WNT signaling pathway                                  | 4.43 x 10 <sup>-5</sup>          | 0.48                                          |
| PLEKHG3     | pleckstrin homology and RhoGEF domain containing G3                     | 4.60 x 10 <sup>-5</sup>          | 0.48                                          |
| ABHD5       | abhydrolase domain containing 5                                         | 6.09 x 10 <sup>-5</sup>          | 0.47                                          |
| SAP30L      | SAP30 like                                                              | 6.51 x 10 <sup>-5</sup>          | 0.47                                          |
| NR6A1       | nuclear receptor subfamily 6 group A member 1                           | 6.75 x 10 <sup>-5</sup>          | 0.47                                          |
| TNFRSF12A   | TNF receptor superfamily member 12A                                     | 7.03 x 10 <sup>-5</sup>          | 0.47                                          |
| C5orf58     | chromosome 5 open reading frame 58                                      | 8.95 x 10 <sup>-5</sup>          | 0.46                                          |
| LRRFIP1     | LRR binding FLII interacting protein 1                                  | 9.09 x 10 <sup>-5</sup>          | 0.46                                          |
| CDC42SE1    | CDC42 small effector 1                                                  | 1.03 x 10 <sup>-4</sup>          | 0.46                                          |

| Gene Symbol | Gene Name                                                                  | P value<br>(FDR-adjusted) | r (partial correlation<br>coefficient) |
|-------------|----------------------------------------------------------------------------|---------------------------|----------------------------------------|
| NCF1        | neutrophil cytosolic factor 1                                              | 1.04 x 10 <sup>-4</sup>   | 0.46                                   |
| DRC1        | dynein regulatory complex subunit 1                                        | 1.07 x 10 <sup>-4</sup>   | 0.46                                   |
| MGAT3       | mannosyl (beta-1,4-)-glycoprotein beta-1,4-N-acetylglucosaminyltransferase | 1.10 x 10 <sup>-4</sup>   | 0.46                                   |
| CTSS        | cathepsin S                                                                | 1.11 x 10 <sup>-4</sup>   | 0.46                                   |
| ANKRD13D    | ankyrin repeat domain 13D                                                  | 1.12 x 10 <sup>-4</sup>   | 0.46                                   |
| RAMP1       | receptor activity modifying protein 1                                      | 1.23 x 10 <sup>-4</sup>   | 0.46                                   |
| ORAI2       | ORAI calcium release-activated calcium modulator 2                         | 1.24 x 10 <sup>-4</sup>   | 0.46                                   |
| MSRB3       | methionine sulfoxide reductase B3                                          | 1.27 x 10 <sup>-4</sup>   | 0.45                                   |
| CEACAM1     | carcinoembryonic antigen related cell adhesion molecule 1                  | 1.45 x 10 <sup>-4</sup>   | 0.45                                   |
| PBX2        | PBX homeobox 2                                                             | 1.47 x 10 <sup>-4</sup>   | 0.45                                   |
| CHMP1B      | charged multivesicular body protein 1B                                     | 1.55 x 10 <sup>-4</sup>   | 0.45                                   |
| AZI2        | 5-azacytidine induced 2                                                    | 1.55 x 10 <sup>-4</sup>   | 0.45                                   |
| TAF12       | TATA-box binding protein associated factor 12                              | 1.63 x 10 <sup>-4</sup>   | 0.45                                   |
| ANP32A-IT1  | ANP32A intronic transcript 1                                               | 1.79 x 10 <sup>-4</sup>   | 0.45                                   |
| PKN2        | protein kinase N2                                                          | 1.90 x 10 <sup>-4</sup>   | 0.44                                   |
| CREB1       | cAMP responsive element binding protein 1                                  | 1.95 x 10 <sup>-4</sup>   | 0.44                                   |
| TNK2        | tyrosine kinase non receptor 2                                             | 1.96 x 10 <sup>-4</sup>   | 0.44                                   |
| VAMP1       | vesicle associated membrane protein 1                                      | 2.02 x 10 <sup>-4</sup>   | 0.44                                   |
| RAB11FIP4   | RAB11 family interacting protein 4                                         | 2.08 x 10 <sup>-4</sup>   | 0.44                                   |
| PHF20L1     | PHD finger protein 20 like 1                                               | 2.30 x 10 <sup>-4</sup>   | 0.44                                   |
| TCAIM       | T cell activation inhibitor, mitochondrial                                 | 2.31 x 10 <sup>-4</sup>   | 0.44                                   |
| REXO5       | RNA exonuclease 5                                                          | 2.35 x 10 <sup>-4</sup>   | 0.44                                   |
| BID         | BH3 interacting domain death agonist                                       | 2.53 x 10 <sup>-4</sup>   | 0.44                                   |
| LPCAT2      | lysophosphatidylcholine acyltransferase 2                                  | 2.61 x 10 <sup>-4</sup>   | 0.44                                   |
| NMNAT1      | nicotinamide nucleotide adenylyltransferase 1                              | 2.72 x 10 <sup>-4</sup>   | 0.43                                   |
| DHRS7       | dehydrogenase/reductase 7                                                  | 2.75 x 10 <sup>-4</sup>   | 0.43                                   |
| YIPF4       | Yip1 domain family member 4                                                | 2.82 x 10 <sup>-4</sup>   | 0.43                                   |
| SPAG9       | sperm associated antigen 9                                                 | 2.96 x 10 <sup>-4</sup>   | 0.43                                   |
| MAX         | MYC associated factor X                                                    | 3.00 x 10 <sup>-4</sup>   | 0.43                                   |
| SLC15A4     | solute carrier family 15 member 4                                          | 3.04 x 10 <sup>-4</sup>   | 0.43                                   |
| MLX         | MAX dimerization protein MLX                                               | 3.07 x 10 <sup>-4</sup>   | 0.43                                   |
| RNF13       | ring finger protein 13                                                     | 3.12 x 10 <sup>-4</sup>   | 0.43                                   |
| APAF1       | apoptotic peptidase activating factor 1                                    | 3.13 x 10 <sup>-4</sup>   | 0.43                                   |
| GPANK1      | G-patch domain and ankyrin repeats 1                                       | 3.23 x 10 <sup>-4</sup>   | 0.43                                   |
| DNM2        | dynamitin 2                                                                | 3.26 x 10 <sup>-4</sup>   | 0.43                                   |
| DIPK2A      | divergent protein kinase domain 2A                                         | 3.31 x 10 <sup>-4</sup>   | 0.43                                   |
| FAM53B-AS1  | FAM53B antisense RNA 1                                                     | 3.32 x 10 <sup>-4</sup>   | 0.43                                   |
| JDP2        | Jun dimerization protein 2                                                 | 3.39 x 10 <sup>-4</sup>   | 0.43                                   |

| Gene Symbol | Gene Name                                                    | P value<br>(FDR-adjusted) | r (partial correlation<br>coefficient) |
|-------------|--------------------------------------------------------------|---------------------------|----------------------------------------|
| RAB8B       | RAB8B, member RAS oncogene family                            | 3.40 x 10 <sup>-4</sup>   | 0.43                                   |
| C5orf56     | chromosome 5 open reading frame 56                           | 3.50 x 10 <sup>-4</sup>   | 0.43                                   |
| SCNN1A      | sodium channel epithelial 1 alpha subunit                    | 3.51 x 10 <sup>-4</sup>   | 0.43                                   |
| BIN3-IT1    | BIN3 intronic transcript 1                                   | 3.52 x 10 <sup>-4</sup>   | 0.43                                   |
| CLDN9       | claudin 9                                                    | 3.58 x 10 <sup>-4</sup>   | 0.43                                   |
| KIAA0232    | KIAA0232                                                     | 3.58 x 10 <sup>-4</sup>   | 0.43                                   |
| LAMB1       | laminin subunit beta 1                                       | 3.59 x 10 <sup>-4</sup>   | 0.43                                   |
| CALCOCO2    | calcium binding and coiled-coil domain 2                     | 3.60 x 10 <sup>-4</sup>   | 0.43                                   |
| TRIM33      | tripartite motif containing 33                               | 3.61 x 10 <sup>-4</sup>   | 0.43                                   |
| SLC16A6     | solute carrier family 16 member 6                            | 3.62 x 10 <sup>-4</sup>   | 0.43                                   |
| LYST        | lysosomal trafficking regulator                              | 3.69 x 10 <sup>-4</sup>   | 0.43                                   |
| MS4A6A      | membrane spanning 4-domains A6A                              | 3.73 x 10 <sup>-4</sup>   | 0.43                                   |
| LIMK1       | LIM domain kinase 1                                          | 3.78 x 10 <sup>-4</sup>   | 0.43                                   |
| EPS15L1     | epidermal growth factor receptor pathway substrate 15 like 1 | 3.79 x 10 <sup>-4</sup>   | 0.43                                   |
| TXNIP       | thioredo x in interacting protein                            | 3.80 x 10 <sup>-4</sup>   | 0.43                                   |
| TRIOBP      | TRIO and F-actin binding protein                             | 3.81 x 10 <sup>-4</sup>   | 0.43                                   |
| GBA2        | glucosylceramidase beta 2                                    | 3.98 x 10 <sup>-4</sup>   | 0.42                                   |
| CGGBP1      | CGG triplet repeat binding protein 1                         | 4.12 x 10 <sup>-4</sup>   | 0.42                                   |
| SOX15       | SRY-bo x 15                                                  | 4.20 x 10 <sup>-4</sup>   | 0.42                                   |
| RNF17       | ring finger protein 17                                       | 4.28 x 10 <sup>-4</sup>   | 0.42                                   |
| PPFIA1      | PTPRF interacting protein alpha 1                            | 4.33 x 10 <sup>-4</sup>   | 0.42                                   |
| SNAP29      | synaptosome associated protein 29                            | 4.43 x 10 <sup>-4</sup>   | 0.42                                   |
| IFNAR2      | interferon alpha and beta receptor subunit 2                 | 4.71 x 10 <sup>-4</sup>   | 0.42                                   |
| NCOA2       | nuclear receptor coactivator 2                               | 4.80 x 10 <sup>-4</sup>   | 0.42                                   |
| SRGN        | serglycin                                                    | 4.80 x 10 <sup>-4</sup>   | 0.42                                   |
| NCR1        | natural cytoto x icity triggering receptor 1                 | 4.83 x 10 <sup>-4</sup>   | 0.42                                   |
| MRPL44      | mitochondrial ribosomal protein L44                          | 4.84 x 10 <sup>-4</sup>   | 0.42                                   |
| CX3CR1      | C-X3-C motif chemokine receptor 1                            | 5.01 x 10 <sup>-4</sup>   | 0.42                                   |
| NFYA        | nuclear transcription factor Y subunit alpha                 | 5.01 x 10 <sup>-4</sup>   | 0.42                                   |
| TACC1       | transforming acidic coiled-coil containing protein 1         | 5.23 x 10 <sup>-4</sup>   | 0.42                                   |
| RAMAC       | RNA guanine-7 methyltransferase activating subunit           | 5.25 x 10 <sup>-4</sup>   | 0.42                                   |
| CPD         | carbo x ypeptidase D                                         | 5.34 x 10 <sup>-4</sup>   | 0.42                                   |
| MBOAT1      | membrane bound O-acyltransferase domain containing 1         | 5.47 x 10 <sup>-4</sup>   | 0.41                                   |
| CSAD        | cysteine sulfinic acid decarbo x ylase                       | 5.53 x 10 <sup>-4</sup>   | 0.41                                   |
| MYLIP       | myosin regulatory light chain interacting protein            | 5.62 x 10 <sup>-4</sup>   | 0.41                                   |
| SV2B        | synaptic vesicle glycoprotein 2B                             | 5.74 x 10 <sup>-4</sup>   | 0.41                                   |
| PRSS30P     | serine protease 30, pseudogene                               | 5.93 x 10 <sup>-4</sup>   | 0.41                                   |
| TWIST2      | twist family bHLH transcription factor 2                     | 5.93 x 10 <sup>-4</sup>   | 0.41                                   |

| Gene Symbol | Gene Name                                                                | P value<br>(FDR-adjusted) | r (partial correlation<br>coefficient) |
|-------------|--------------------------------------------------------------------------|---------------------------|----------------------------------------|
| CD300A      | CD300a molecule                                                          | 6.02 x 10 <sup>-4</sup>   | 0.41                                   |
| ITPK1-AS1   | ITPK1 antisense RNA 1                                                    | 6.03 x 10 <sup>-4</sup>   | 0.41                                   |
| YPEL3       | yippee like 3                                                            | 6.24 x 10 <sup>-4</sup>   | 0.41                                   |
| STX3        | synta x in 3                                                             | 6.43 x 10 <sup>-4</sup>   | 0.41                                   |
| GSN         | gelsolin                                                                 | 6.45 x 10 <sup>-4</sup>   | 0.41                                   |
| SSH1        | slingshot protein phosphatase 1                                          | 6.48 x 10 <sup>-4</sup>   | 0.41                                   |
| UBALD1      | UBA like domain containing 1                                             | 6.50 x 10 <sup>-4</sup>   | 0.41                                   |
| INPP4A      | inositol polyphosphate-4-phosphatase type I A                            | 6.59 x 10 <sup>-4</sup>   | 0.41                                   |
| FAM120A     | family with sequence similarity 120A                                     | 6.65 x 10 <sup>-4</sup>   | 0.41                                   |
| FAM131A     | family with sequence similarity 131 member A                             | 6.74 x 10 <sup>-4</sup>   | 0.41                                   |
| PSTPIP2     | proline-serine-threonine phosphatase interacting protein 2               | 6.78 x 10 <sup>-4</sup>   | 0.41                                   |
| NADSYN1     | NAD synthetase 1                                                         | 6.84 x 10 <sup>-4</sup>   | 0.41                                   |
| CUEDC1      | CUE domain containing 1                                                  | 6.91 x 10 <sup>-4</sup>   | 0.41                                   |
| UNC13D      | unc-13 homolog D                                                         | 7.01 x 10 <sup>-4</sup>   | 0.41                                   |
| STARD10     | StAR related lipid transfer domain containing 10                         | 7.12 x 10 <sup>-4</sup>   | 0.41                                   |
| DIP2B       | disco interacting protein 2 homolog B                                    | 7.16 x 10 <sup>-4</sup>   | 0.41                                   |
| OGFRL1      | opioid growth factor receptor like 1                                     | 7.28 x 10 <sup>-4</sup>   | 0.41                                   |
| RAB1A       | RAB1A, member RAS oncogene family                                        | 7.38 x 10 <sup>-4</sup>   | 0.41                                   |
| SLC18A2     | solute carrier family 18 member A2                                       | 7.45 x 10 <sup>-4</sup>   | 0.41                                   |
| FMNL1       | formin like 1                                                            | 7.51 x 10 <sup>-4</sup>   | 0.41                                   |
| TGFBR2      | transforming growth factor beta receptor 2                               | 7.51 x 10 <sup>-4</sup>   | 0.41                                   |
| NBN         | nibrin                                                                   | 7.71 x 10 <sup>-4</sup>   | 0.40                                   |
| CD58        | CD58 molecule                                                            | 7.73 x 10 <sup>-4</sup>   | 0.40                                   |
| CCDC97      | coiled-coil domain containing 97                                         | 7.79 x 10 <sup>-4</sup>   | 0.40                                   |
| CLRN1       | clarin 1                                                                 | 7.92 x 10 <sup>-4</sup>   | 0.40                                   |
| ROCK1       | Rho associated coiled-coil containing protein kinase 1                   | 7.95 x 10 <sup>-4</sup>   | 0.40                                   |
| GLIS3-AS1   | GLIS3 antisense RNA 1                                                    | 8.18 x 10 <sup>-4</sup>   | 0.40                                   |
| STXBP5      | synta x in binding protein 5                                             | 8.24 x 10 <sup>-4</sup>   | 0.40                                   |
| PRRG4       | proline rich and Gla domain 4                                            | 8.32 x 10 <sup>-4</sup>   | 0.40                                   |
| DGLUCY      | D-glutamate cyclase                                                      | 8.49 x 10 <sup>-4</sup>   | 0.40                                   |
| NUP50       | nucleoporin 50                                                           | 8.56 x 10 <sup>-4</sup>   | 0.40                                   |
| JMJD6       | jumonji domain containing 6, arginine demethylase and lysine hydroxylase | 8.65 x 10 <sup>-4</sup>   | 0.40                                   |
| PDS5B       | PDS5 cohesin associated factor B                                         | 8.72 x 10 <sup>-4</sup>   | 0.40                                   |
| SNAP23      | synaptosome associated protein 23                                        | 8.90 x 10 <sup>-4</sup>   | 0.40                                   |
| CDS2        | CDP-diacylglycerol synthase 2                                            | 8.97 x 10 <sup>-4</sup>   | 0.40                                   |
| DLEU2       | deleted in lymphocytic leukemia 2                                        | 9.06 x 10 <sup>-4</sup>   | 0.40                                   |
| AGTR2       | angiotensin II receptor type 2                                           | 9.10 x 10 <sup>-4</sup>   | 0.40                                   |
| VSTM1       | V-set and transmembrane domain containing 1                              | 9.14 x 10 <sup>-4</sup>   | 0.40                                   |

| Gene Symbol | Gene Name                                                                    | P value<br>(FDR-adjusted) | r (partial correlation<br>coefficient) |
|-------------|------------------------------------------------------------------------------|---------------------------|----------------------------------------|
| KY          | kyphoscoliosis peptidase                                                     | 9.24 x 10 <sup>-4</sup>   | 0.40                                   |
| TOX4        | TOX high mobility group box family member 4                                  | 9.27 x 10 <sup>-4</sup>   | 0.40                                   |
| RPGRIP1     | RPGR interacting protein 1                                                   | 9.34 x 10 <sup>-4</sup>   | 0.40                                   |
| DPP9        | dipeptidyl peptidase 9                                                       | 9.35 x 10 <sup>-4</sup>   | 0.40                                   |
| KCTD5       | potassium channel tetramerization domain containing 5                        | 9.52 x 10 <sup>-4</sup>   | 0.40                                   |
| LINC01341   | long intergenic non-protein coding RNA 1341                                  | 9.68 x 10 <sup>-4</sup>   | 0.40                                   |
| QKI         | QKI, KH domain containing RNA binding                                        | 9.69 x 10 <sup>-4</sup>   | 0.40                                   |
| SLC5A12     | solute carrier family 5 member 12                                            | 9.75 x 10 <sup>-4</sup>   | 0.40                                   |
| S100A6      | S100 calcium binding protein A6                                              | 9.82 x 10 <sup>-4</sup>   | 0.40                                   |
| STRN        | striatin                                                                     | 9.87 x 10 <sup>-4</sup>   | 0.40                                   |
| ZFAND5      | zinc finger AN1-type containing 5                                            | 1.01 x 10 <sup>-3</sup>   | 0.40                                   |
| PDLIM5      | PDZ and LIM domain 5                                                         | 1.02 x 10 <sup>-3</sup>   | 0.40                                   |
| MEGF9       | multiple EGF like domains 9                                                  | 1.02 x 10 <sup>-3</sup>   | 0.40                                   |
| PLIN5       | perilipin 5                                                                  | 1.02 x 10 <sup>-3</sup>   | 0.40                                   |
| UNKL        | unk like zinc finger                                                         | 1.02 x 10 <sup>-3</sup>   | 0.40                                   |
| HDAC10      | histone deacetylase 10                                                       | 1.03 x 10 <sup>-3</sup>   | 0.40                                   |
| ZNF552      | zinc finger protein 552                                                      | 1.05 x 10 <sup>-3</sup>   | 0.39                                   |
| RGR         | retinal G protein coupled receptor                                           | 1.06 x 10 <sup>-3</sup>   | 0.39                                   |
| IFITM10     | interferon induced transmembrane protein 10                                  | 1.08 x 10 <sup>-3</sup>   | 0.39                                   |
| SHE         | Src homology 2 domain containing E                                           | 1.08 x 10 <sup>-3</sup>   | 0.39                                   |
| COX6B1      | cytochrome c oxidase subunit 6B1                                             | 1.09 x 10 <sup>-3</sup>   | 0.39                                   |
| ZBTB34      | zinc finger and BTB domain containing 34                                     | 1.09 x 10 <sup>-3</sup>   | 0.39                                   |
| LPGAT1      | lysophosphatidylglycerol acyltransferase 1                                   | 1.10 x 10 <sup>-3</sup>   | 0.39                                   |
| PTPN12      | protein tyrosine phosphatase, non-receptor type 12                           | 1.11 x 10 <sup>-3</sup>   | 0.39                                   |
| RNF130      | ring finger protein 130                                                      | 1.11 x 10 <sup>-3</sup>   | 0.39                                   |
| SP3         | Sp3 transcription factor                                                     | 1.12 x 10 <sup>-3</sup>   | 0.39                                   |
| TLE4        | TLE family member 4, transcriptional corepressor                             | 1.12 x 10 <sup>-3</sup>   | 0.39                                   |
| RNF114      | ring finger protein 114                                                      | 1.13 x 10 <sup>-3</sup>   | 0.39                                   |
| UBE2W       | ubiquitin conjugating enzyme E2 W                                            | 1.15 x 10 <sup>-3</sup>   | 0.39                                   |
| PTTG2       | pituitary tumor-transforming 2                                               | 1.18 x 10 <sup>-3</sup>   | 0.39                                   |
| UNC119      | unc-119 lipid binding chaperone                                              | 1.23 x 10 <sup>-3</sup>   | 0.39                                   |
| IKBIP       | IKKB interacting protein                                                     | 1.25 x 10 <sup>-3</sup>   | 0.39                                   |
| KIF13A      | kinesin family member 13A                                                    | 1.26 x 10 <sup>-3</sup>   | 0.39                                   |
| MCAM        | melanoma cell adhesion molecule                                              | 1.27 x 10 <sup>-3</sup>   | 0.39                                   |
| APBB1IP     | amyloid beta precursor protein binding family B member 1 interacting protein | 1.28 x 10 <sup>-3</sup>   | 0.39                                   |
| FEZ2        | fasciculation and elongation protein zeta 2                                  | 1.28 x 10 <sup>-3</sup>   | 0.39                                   |
| OSBPL6      | oxysterol binding protein like 6                                             | 1.32 x 10 <sup>-3</sup>   | 0.39                                   |
| PDK3        | pyruvate dehydrogenase kinase 3                                              | 1.33 x 10 <sup>-3</sup>   | 0.39                                   |

| Gene Symbol | Gene Name                                                      | P value<br>(FDR-adjusted) | r (partial correlation<br>coefficient) |
|-------------|----------------------------------------------------------------|---------------------------|----------------------------------------|
| PRAC2       | PRAC2 small nuclear protein                                    | 1.33 x 10 <sup>-3</sup>   | 0.39                                   |
| CHRN3       | cholinergic receptor nicotinic beta 3 subunit                  | 1.34 x 10 <sup>-3</sup>   | 0.39                                   |
| GDAP2       | ganglioside induced differentiation associated protein 2       | 1.34 x 10 <sup>-3</sup>   | 0.39                                   |
| LPIN3       | lipin 3                                                        | 1.34 x 10 <sup>-3</sup>   | 0.39                                   |
| CCDC170     | coiled-coil domain containing 170                              | 1.35 x 10 <sup>-3</sup>   | 0.39                                   |
| LINC-PINT   | long intergenic non-protein coding RNA, p53 induced transcript | 1.35 x 10 <sup>-3</sup>   | 0.39                                   |
| PRKAR1A     | protein kinase cAMP-dependent type I regulatory subunit alpha  | 1.35 x 10 <sup>-3</sup>   | 0.39                                   |
| SYTL3       | synaptotagmin like 3                                           | 1.36 x 10 <sup>-3</sup>   | 0.39                                   |
| RBMS1       | RNA binding motif single stranded interacting protein 1        | 1.37 x 10 <sup>-3</sup>   | 0.39                                   |
| CLEC4E      | C-type lectin domain family 4 member E                         | 1.38 x 10 <sup>-3</sup>   | 0.39                                   |
| PCYT1A      | phosphate cytidyltransferase 1, choline, alpha                 | 1.39 x 10 <sup>-3</sup>   | 0.39                                   |
| HSPA12B     | heat shock protein family A (Hsp70) member 12B                 | 1.40 x 10 <sup>-3</sup>   | 0.39                                   |
| TGOLN2      | trans-golgi network protein 2                                  | 1.41 x 10 <sup>-3</sup>   | 0.39                                   |
| CASP8       | caspase 8                                                      | 1.42 x 10 <sup>-3</sup>   | 0.39                                   |
| SLC45A4     | solute carrier family 45 member 4                              | 1.45 x 10 <sup>-3</sup>   | 0.38                                   |
| HTATIP2     | HIV-1 Tat interactive protein 2                                | 1.47 x 10 <sup>-3</sup>   | 0.38                                   |
| GALNT17     | polypeptide N-acetylgalactosaminyltransferase 17               | 1.47 x 10 <sup>-3</sup>   | 0.38                                   |
| C7orf61     | chromosome 7 open reading frame 61                             | 1.48 x 10 <sup>-3</sup>   | 0.38                                   |
| FLI1        | Fli-1 proto-oncogene, ETS transcription factor                 | 1.48 x 10 <sup>-3</sup>   | 0.38                                   |
| CHD2        | chromodomain helicase DNA binding protein 2                    | 1.48 x 10 <sup>-3</sup>   | 0.38                                   |
| SDF2        | stromal cell derived factor 2                                  | 1.48 x 10 <sup>-3</sup>   | 0.38                                   |
| CHIC2       | cysteine rich hydrophobic domain 2                             | 1.54 x 10 <sup>-3</sup>   | 0.38                                   |
| HIST1H2AJ   | histone cluster 1 H2A family member j                          | 1.55 x 10 <sup>-3</sup>   | 0.38                                   |
| HIST1H3I    | histone cluster 1 H3 family member i                           | 1.56 x 10 <sup>-3</sup>   | 0.38                                   |
| OGA         | O-GlcNAcase                                                    | 1.56 x 10 <sup>-3</sup>   | 0.38                                   |
| SMPDL3A     | sphingomyelin phosphodiesterase acid like 3A                   | 1.56 x 10 <sup>-3</sup>   | 0.38                                   |
| CACNA1I     | calcium voltage-gated channel subunit alpha 1 I                | 1.57 x 10 <sup>-3</sup>   | 0.38                                   |
| RBM5        | RNA binding motif protein 5                                    | 1.57 x 10 <sup>-3</sup>   | 0.38                                   |
| MTMR14      | myotubularin related protein 14                                | 1.58 x 10 <sup>-3</sup>   | 0.38                                   |
| PARP8       | poly(ADP-ribose) polymerase family member 8                    | 1.59 x 10 <sup>-3</sup>   | 0.38                                   |
| UBE2O       | ubiquitin conjugating enzyme E2 O                              | 1.61 x 10 <sup>-3</sup>   | 0.38                                   |
| SNX20       | sorting nexin 20                                               | 1.63 x 10 <sup>-3</sup>   | 0.38                                   |
| EVA1B       | eva-1 homolog B                                                | 1.65 x 10 <sup>-3</sup>   | 0.38                                   |
| TMEM154     | transmembrane protein 154                                      | 1.65 x 10 <sup>-3</sup>   | 0.38                                   |
| GUCY2D      | guanylate cyclase 2D, retinal                                  | 1.67 x 10 <sup>-3</sup>   | 0.38                                   |
| NMUR1       | neuromedin U receptor 1                                        | 1.71 x 10 <sup>-3</sup>   | 0.38                                   |
| XIAP        | X-linked inhibitor of apoptosis                                | 1.73 x 10 <sup>-3</sup>   | 0.38                                   |
| AKT1        | AKT serine/threonine kinase 1                                  | 1.74 x 10 <sup>-3</sup>   | 0.38                                   |

| Gene Symbol | Gene Name                                                 | <i>P</i> value<br>(FDR-adjusted) | <i>r</i> (partial correlation<br>coefficient) |
|-------------|-----------------------------------------------------------|----------------------------------|-----------------------------------------------|
| GABARAPL1   | GABA type A receptor associated protein like 1            | 1.75 x 10 <sup>-3</sup>          | 0.38                                          |
| PGS1        | phosphatidylglycerophosphate synthase 1                   | 1.76 x 10 <sup>-3</sup>          | 0.38                                          |
| PPP1R12B    | protein phosphatase 1 regulatory subunit 12B              | 1.82 x 10 <sup>-3</sup>          | 0.38                                          |
| SIRPB2      | signal regulatory protein beta 2                          | 1.82 x 10 <sup>-3</sup>          | 0.38                                          |
| CASS4       | Cas scaffold protein family member 4                      | 1.83 x 10 <sup>-3</sup>          | 0.38                                          |
| PMAIP1      | phorbol-12-myristate-13-acetate-induced protein 1         | 1.85 x 10 <sup>-3</sup>          | 0.38                                          |
| ADGRV1      | adhesion G protein-coupled receptor V1                    | 1.86 x 10 <sup>-3</sup>          | 0.38                                          |
| RBP7        | retinol binding protein 7                                 | 1.86 x 10 <sup>-3</sup>          | 0.38                                          |
| TRIM56      | tripartite motif containing 56                            | 1.86 x 10 <sup>-3</sup>          | 0.38                                          |
| MTG2        | mitochondrial ribosome associated GTPase 2                | 1.89 x 10 <sup>-3</sup>          | 0.38                                          |
| PSMB8-AS1   | PSMB8 antisense RNA 1 (head to head)                      | 1.91 x 10 <sup>-3</sup>          | 0.38                                          |
| FBXL20      | F-box and leucine rich repeat protein 20                  | 1.92 x 10 <sup>-3</sup>          | 0.38                                          |
| PGM2        | phosphoglucomutase 2                                      | 1.92 x 10 <sup>-3</sup>          | 0.38                                          |
| CLMP        | CXADR like membrane protein                               | 1.95 x 10 <sup>-3</sup>          | 0.37                                          |
| FAM192A     | family with sequence similarity 192 member A              | 1.96 x 10 <sup>-3</sup>          | 0.37                                          |
| ZDHHC18     | zinc finger DHHC-type containing 18                       | 1.96 x 10 <sup>-3</sup>          | 0.37                                          |
| ARHGEF2     | Rho/Rac guanine nucleotide exchange factor 2              | 1.97 x 10 <sup>-3</sup>          | 0.37                                          |
| SLC6A6      | solute carrier family 6 member 6                          | 1.98 x 10 <sup>-3</sup>          | 0.37                                          |
| ARHGAP27    | Rho GTPase activating protein 27                          | 2.00 x 10 <sup>-3</sup>          | 0.37                                          |
| SH2D3C      | SH2 domain containing 3C                                  | 2.00 x 10 <sup>-3</sup>          | 0.37                                          |
| USF3        | upstream transcription factor family member 3             | 2.03 x 10 <sup>-3</sup>          | 0.37                                          |
| STX11       | syntaxin 11                                               | 2.06 x 10 <sup>-3</sup>          | 0.37                                          |
| PTPRJ       | protein tyrosine phosphatase, receptor type J             | 2.07 x 10 <sup>-3</sup>          | 0.37                                          |
| RASGEF1A    | RasGEF domain family member 1A                            | 2.07 x 10 <sup>-3</sup>          | 0.37                                          |
| RC3H1       | ring finger and CCCH-type domains 1                       | 2.08 x 10 <sup>-3</sup>          | 0.37                                          |
| SVOP        | SV2 related protein                                       | 2.08 x 10 <sup>-3</sup>          | 0.37                                          |
| IFRD1       | interferon related developmental regulator 1              | 2.10 x 10 <sup>-3</sup>          | 0.37                                          |
| HIST1H2AC   | histone cluster 1 H2A family member c                     | 2.13 x 10 <sup>-3</sup>          | 0.37                                          |
| IRF1        | interferon regulatory factor 1                            | 2.17 x 10 <sup>-3</sup>          | 0.37                                          |
| POLR2J      | RNA polymerase II subunit J                               | 2.18 x 10 <sup>-3</sup>          | 0.37                                          |
| LINC00527   | long intergenic non-protein coding RNA 527                | 2.19 x 10 <sup>-3</sup>          | 0.37                                          |
| GLIPR1      | GLI pathogenesis related 1                                | 2.23 x 10 <sup>-3</sup>          | 0.37                                          |
| KLK12       | kallikrein related peptidase 12                           | 2.26 x 10 <sup>-3</sup>          | 0.37                                          |
| LGALS1      | galectin like                                             | 2.27 x 10 <sup>-3</sup>          | 0.37                                          |
| MAT2B       | methionine adenosyltransferase 2B                         | 2.27 x 10 <sup>-3</sup>          | 0.37                                          |
| TUT7        | terminal uridylyl transferase 7                           | 2.28 x 10 <sup>-3</sup>          | 0.37                                          |
| ADIRF       | adipogenesis regulatory factor                            | 2.32 x 10 <sup>-3</sup>          | 0.37                                          |
| APOBEC3G    | apolipoprotein B mRNA editing enzyme catalytic subunit 3G | 2.34 x 10 <sup>-3</sup>          | 0.37                                          |

| Gene Symbol | Gene Name                                                  | <i>P</i> value<br>(FDR-adjusted) | <i>r</i> (partial correlation<br>coefficient) |
|-------------|------------------------------------------------------------|----------------------------------|-----------------------------------------------|
| BAHCC1      | BAH domain and coiled-coil containing 1                    | 2.34 x 10 <sup>-3</sup>          | 0.37                                          |
| FAM163A     | family with sequence similarity 163 member A               | 2.34 x 10 <sup>-3</sup>          | 0.37                                          |
| ALOX5AP     | arachidonate 5-lipo x ygenase activating protein           | 2.36 x 10 <sup>-3</sup>          | 0.37                                          |
| HIST1H2AI   | histone cluster 1 H2A family member i                      | 2.36 x 10 <sup>-3</sup>          | 0.37                                          |
| TRIM13      | tripartite motif containing 13                             | 2.41 x 10 <sup>-3</sup>          | 0.37                                          |
| ATG7        | autophagy related 7                                        | 2.44 x 10 <sup>-3</sup>          | 0.37                                          |
| STAT1       | signal transducer and activator of transcription 1         | 2.45 x 10 <sup>-3</sup>          | 0.37                                          |
| CYGB        | cytoglobin                                                 | 2.48 x 10 <sup>-3</sup>          | 0.37                                          |
| IFNGR1      | interferon gamma receptor 1                                | 2.49 x 10 <sup>-3</sup>          | 0.37                                          |
| EFHD2       | EF-hand domain family member D2                            | 2.51 x 10 <sup>-3</sup>          | 0.37                                          |
| MAP3K11     | mitogen-activated protein kinase 11                        | 2.53 x 10 <sup>-3</sup>          | 0.37                                          |
| PRKAG2      | protein kinase AMP-activated non-catalytic subunit gamma 2 | 2.53 x 10 <sup>-3</sup>          | 0.37                                          |
| ARSG        | arylsulfatase G                                            | 2.55 x 10 <sup>-3</sup>          | 0.37                                          |
| TBC1D2B     | TCB1 domain family member 2B                               | 2.56 x 10 <sup>-3</sup>          | 0.37                                          |



**Table III.** Genes Associated with Age Expressed in Cohort 1 and Confirmed in Cohort 2 in Patients with Ischemic Stroke

| Gene Symbol | Gene Name                                               | <i>P</i> value (FDR-adjusted) |                         | <i>r</i> (partial correlation coefficient) |          | Present In*                       |                                    |
|-------------|---------------------------------------------------------|-------------------------------|-------------------------|--------------------------------------------|----------|-----------------------------------|------------------------------------|
|             |                                                         | Cohort 1                      | Cohort 2                | Cohort 1                                   | Cohort 2 | Peters (2015) Study <sup>22</sup> | Digital Ageing Atlas <sup>23</sup> |
| ABLIM1      | actin binding LIM protein 1                             | 1.32 x 10 <sup>-4</sup>       | 1.35 x 10 <sup>-4</sup> | -0.39                                      | -0.45    | 1                                 | 1                                  |
| ADAM28      | ADAM metalloproteinase domain 28                        | 1.66 x 10 <sup>-4</sup>       | 2.25 x 10 <sup>-3</sup> | -0.39                                      | -0.37    | 0                                 | 0                                  |
| AGMAT       | agmatinase                                              | 1.81 x 10 <sup>-4</sup>       | 2.18 x 10 <sup>-5</sup> | -0.39                                      | -0.50    | 1                                 | 0                                  |
| ATF7IP2     | activating transcription factor 7 interacting protein 2 | 8.74 x 10 <sup>-5</sup>       | 3.74 x 10 <sup>-4</sup> | -0.40                                      | -0.43    | 1                                 | 0                                  |
| B3GALT2     | beta-1,3-galactosyltransferase 2                        | 1.02 x 10 <sup>-4</sup>       | 3.56 x 10 <sup>-4</sup> | -0.40                                      | -0.43    | 1                                 | 0                                  |
| BANK1       | B cell scaffold protein with ankyrin repeats 1          | 6.27 x 10 <sup>-6</sup>       | 5.67 x 10 <sup>-6</sup> | -0.46                                      | -0.53    | 1                                 | 0                                  |
| BCL11A      | BAF chromatin remodeling complex subunit BCL11A         | 2.76 x 10 <sup>-4</sup>       | 4.41 x 10 <sup>-4</sup> | -0.38                                      | -0.42    | 1                                 | 1                                  |
| BCL7A       | BAF chromatin remodeling complex subunit BCL7A          | 1.97 x 10 <sup>-4</sup>       | 4.14 x 10 <sup>-4</sup> | -0.39                                      | -0.42    | 0                                 | 0                                  |
| BLNK        | B cell linker                                           | 1.23 x 10 <sup>-5</sup>       | 5.61 x 10 <sup>-6</sup> | -0.45                                      | -0.53    | 0                                 | 0                                  |
| BTLA        | B and T lymphocyte associated                           | 3.66 x 10 <sup>-6</sup>       | 1.80 x 10 <sup>-3</sup> | -0.47                                      | -0.38    | 1                                 | 0                                  |
| CAMK4       | calcium/calmodulin dependent protein kinase IV          | 2.45 x 10 <sup>-4</sup>       | 3.26 x 10 <sup>-4</sup> | -0.38                                      | -0.43    | 1                                 | 1                                  |
| CCR6        | C-C motif chemokine receptor 6                          | 2.04 x 10 <sup>-7</sup>       | 2.27 x 10 <sup>-6</sup> | -0.52                                      | -0.55    | 1                                 | 0                                  |
| CCR7        | C-C motif chemokine receptor 7                          | 1.62 x 10 <sup>-4</sup>       | 1.82 x 10 <sup>-4</sup> | -0.39                                      | -0.45    | 1                                 | 0                                  |
| CD27        | CD27 molecule                                           | 1.87 x 10 <sup>-4</sup>       | 1.33 x 10 <sup>-3</sup> | -0.39                                      | -0.39    | 1                                 | 0                                  |
| CD79B       | CD79b molecule                                          | 3.29 x 10 <sup>-5</sup>       | 2.31 x 10 <sup>-5</sup> | -0.43                                      | -0.50    | 1                                 | 1                                  |
| CDCA7L      | cell division cycle associated 7 like                   | 4.39 x 10 <sup>-5</sup>       | 1.70 x 10 <sup>-5</sup> | -0.42                                      | -0.50    | 1                                 | 0                                  |
| CMSS1       | cms1 ribosomal small subunit homolog                    | 4.32 x 10 <sup>-4</sup>       | 1.38 x 10 <sup>-3</sup> | -0.37                                      | -0.39    | 1                                 | 1                                  |
| COBLL1      | cordon-bleu WH2 repeat protein like 1                   | 2.02 x 10 <sup>-5</sup>       | 6.07 x 10 <sup>-5</sup> | -0.44                                      | -0.47    | 1                                 | 0                                  |
| CR2         | complement C3d receptor 2                               | 2.75 x 10 <sup>-6</sup>       | 3.22 x 10 <sup>-6</sup> | -0.47                                      | -0.54    | 1                                 | 0                                  |
| CXCR5       | C-X-C motif chemokine receptor 5                        | 9.97 x 10 <sup>-5</sup>       | 4.62 x 10 <sup>-7</sup> | -0.40                                      | -0.57    | 1                                 | 0                                  |
| EPHA4       | EPH receptor A4                                         | 4.14 x 10 <sup>-4</sup>       | 1.80 x 10 <sup>-5</sup> | -0.37                                      | -0.50    | 1                                 | 0                                  |
| NIBAN3      | niban apoptosis regulator 3                             | 4.49 x 10 <sup>-6</sup>       | 3.33 x 10 <sup>-4</sup> | -0.47                                      | -0.43    | 1                                 | 0                                  |
| FCER2       | Fc fragment of IgE receptor II                          | 1.84 x 10 <sup>-4</sup>       | 2.92 x 10 <sup>-4</sup> | -0.39                                      | -0.43    | 0                                 | 0                                  |
| FCRL1       | Fc receptor like 1                                      | 3.67 x 10 <sup>-5</sup>       | 3.26 x 10 <sup>-4</sup> | -0.42                                      | -0.43    | 0                                 | 0                                  |
| FCRL2       | Fc receptor like 2                                      | 7.17 x 10 <sup>-5</sup>       | 2.87 x 10 <sup>-5</sup> | -0.41                                      | -0.49    | 0                                 | 0                                  |
| FCRLA       | Fc receptor like A                                      | 7.05 x 10 <sup>-5</sup>       | 3.99 x 10 <sup>-6</sup> | -0.41                                      | -0.53    | 1                                 | 0                                  |
| GPR183      | G protein-coupled receptor 183                          | 1.93 x 10 <sup>-4</sup>       | 1.35 x 10 <sup>-3</sup> | -0.39                                      | -0.39    | 0                                 | 0                                  |
| ID3         | inhibitor of DNA binding 3, HLH protein                 | 1.48 x 10 <sup>-4</sup>       | 1.28 x 10 <sup>-4</sup> | -0.39                                      | -0.45    | 1                                 | 0                                  |
| IFT57       | intraflagellar transport 57                             | 2.56 x 10 <sup>-4</sup>       | 2.65 x 10 <sup>-4</sup> | -0.38                                      | -0.44    | 0                                 | 0                                  |
| IGHM        | immunoglobulin heavy constant mu                        | 5.17 x 10 <sup>-4</sup>       | 3.04 x 10 <sup>-6</sup> | -0.36                                      | -0.54    | 0                                 | 0                                  |

| Gene Symbol | Gene Name                                                               | <i>P</i> value (FDR-adjusted) |                         | <i>r</i> (partial correlation coefficient) |          | Present In*                       |                                    |
|-------------|-------------------------------------------------------------------------|-------------------------------|-------------------------|--------------------------------------------|----------|-----------------------------------|------------------------------------|
|             |                                                                         | Cohort 1                      | Cohort 2                | Cohort 1                                   | Cohort 2 | Peters (2015) Study <sup>22</sup> | Digital Ageing Atlas <sup>23</sup> |
| ITPR1       | inositol 1,4,5-trisphosphate receptor type 1                            | 3.41 x 10 <sup>-4</sup>       | 1.36 x 10 <sup>-4</sup> | -0.37                                      | -0.45    | 0                                 | 0                                  |
| KAT2A       | lysine acetyltransferase 2A                                             | 5.25 x 10 <sup>-5</sup>       | 1.46 x 10 <sup>-3</sup> | -0.42                                      | -0.38    | 1                                 | 1                                  |
| KHDRBS2     | KH RNA binding domain containing, signal transduction associated 2      | 1.42 x 10 <sup>-4</sup>       | 1.99 x 10 <sup>-3</sup> | -0.39                                      | -0.37    | 0                                 | 0                                  |
| KIF5C       | kinesin family member 5C                                                | 5.18 x 10 <sup>-4</sup>       | 8.44 x 10 <sup>-6</sup> | -0.36                                      | -0.52    | 1                                 | 0                                  |
| KLHL14      | kelch like family member 14                                             | 3.67 x 10 <sup>-5</sup>       | 3.80 x 10 <sup>-5</sup> | -0.42                                      | -0.48    | 0                                 | 0                                  |
| LDHB        | lactate dehydrogenase B                                                 | 1.71 x 10 <sup>-4</sup>       | 8.14 x 10 <sup>-4</sup> | -0.39                                      | -0.40    | 1                                 | 0                                  |
| LEF1-AS1    | LEF1 antisense RNA 1                                                    | 1.86 x 10 <sup>-4</sup>       | 1.76 x 10 <sup>-3</sup> | -0.39                                      | -0.38    | 0                                 | 0                                  |
| MGAT5       | alpha-1,6-mannosylglycoprotein 6-beta-N-acetylglucosaminyltransferase   | 7.32 x 10 <sup>-6</sup>       | 1.45 x 10 <sup>-4</sup> | -0.46                                      | -0.45    | 0                                 | 0                                  |
| NBEA        | neurobeachin                                                            | 8.38 x 10 <sup>-6</sup>       | 3.86 x 10 <sup>-7</sup> | -0.45                                      | -0.58    | 1                                 | 0                                  |
| NELL2       | neural EGFL like 2                                                      | 1.81 x 10 <sup>-4</sup>       | 3.67 x 10 <sup>-4</sup> | -0.39                                      | -0.43    | 1                                 | 0                                  |
| NT5E        | 5'-nucleotidase ecto                                                    | 2.44 x 10 <sup>-8</sup>       | 1.46 x 10 <sup>-6</sup> | -0.55                                      | -0.55    | 1                                 | 0                                  |
| OSBPL10     | oxysterol binding protein like 10                                       | 5.52 x 10 <sup>-5</sup>       | 1.08 x 10 <sup>-6</sup> | -0.41                                      | -0.56    | 1                                 | 0                                  |
| P2RX5       | purinergic receptor P2X 5                                               | 2.15 x 10 <sup>-6</sup>       | 5.31 x 10 <sup>-6</sup> | -0.48                                      | -0.53    | 1                                 | 0                                  |
| PAX5        | paired box 5                                                            | 1.12 x 10 <sup>-4</sup>       | 3.90 x 10 <sup>-5</sup> | -0.40                                      | -0.48    | 0                                 | 0                                  |
| PDLIM5      | PDZ and LIM domain 5                                                    | 4.74 x 10 <sup>-4</sup>       | 1.02 x 10 <sup>-3</sup> | 0.36                                       | 0.40     | 0                                 | 0                                  |
| PIK3C2B     | phosphatidylinositol-4-phosphate 3-kinase catalytic subunit type 2 beta | 3.18 x 10 <sup>-4</sup>       | 2.01 x 10 <sup>-5</sup> | -0.37                                      | -0.50    | 1                                 | 0                                  |
| PLEKHG1     | pleckstrin homology and RhoGEF domain containing G1                     | 5.54 x 10 <sup>-5</sup>       | 1.55 x 10 <sup>-4</sup> | -0.41                                      | -0.45    | 0                                 | 0                                  |
| PLPP5       | phospholipid phosphatase 5                                              | 5.05 x 10 <sup>-4</sup>       | 1.08 x 10 <sup>-4</sup> | -0.36                                      | -0.46    | 0                                 | 0                                  |
| POU2AF1     | POU class 2 associating factor 1                                        | 3.34 x 10 <sup>-4</sup>       | 2.23 x 10 <sup>-5</sup> | -0.37                                      | -0.50    | 1                                 | 0                                  |
| PTPRK       | protein tyrosine phosphatase, receptor type K                           | 2.37 x 10 <sup>-6</sup>       | 2.87 x 10 <sup>-5</sup> | -0.48                                      | -0.49    | 1                                 | 0                                  |
| QRSL1       | glutamyl-tRNA amidotransferase subunit QRSL1                            | 7.28 x 10 <sup>-5</sup>       | 1.65 x 10 <sup>-5</sup> | -0.41                                      | -0.50    | 0                                 | 0                                  |
| RAB30       | RAB30, member RAS oncogene family                                       | 1.96 x 10 <sup>-5</sup>       | 7.05 x 10 <sup>-6</sup> | -0.44                                      | -0.52    | 0                                 | 0                                  |
| RALGPS2     | Ral GEF with PH domain and SH3 binding motif 2                          | 3.21 x 10 <sup>-5</sup>       | 4.09 x 10 <sup>-6</sup> | -0.43                                      | -0.53    | 0                                 | 0                                  |
| RASGRP3     | RAS guanyl releasing protein 3                                          | 3.83 x 10 <sup>-6</sup>       | 4.85 x 10 <sup>-4</sup> | -0.47                                      | -0.42    | 1                                 | 0                                  |
| RPL22       | ribosomal protein L22                                                   | 4.65 x 10 <sup>-5</sup>       | 1.00 x 10 <sup>-3</sup> | -0.42                                      | -0.40    | 1                                 | 0                                  |
| SEL1L3      | SEL1L family member 3                                                   | 2.91 x 10 <sup>-4</sup>       | 4.75 x 10 <sup>-7</sup> | -0.38                                      | -0.57    | 1                                 | 0                                  |
| SESN1       | sestrin 1                                                               | 1.54 x 10 <sup>-4</sup>       | 1.85 x 10 <sup>-3</sup> | -0.39                                      | -0.38    | 1                                 | 0                                  |
| SHISAL2A    | shisa like 2A                                                           | 3.43 x 10 <sup>-4</sup>       | 8.14 x 10 <sup>-4</sup> | -0.37                                      | -0.40    | 0                                 | 0                                  |
| SLC9A7      | solute carrier family 9 member A7                                       | 4.95 x 10 <sup>-5</sup>       | 1.29 x 10 <sup>-3</sup> | -0.42                                      | -0.39    | 0                                 | 0                                  |
| SPIB        | Spi-B transcription factor                                              | 1.14 x 10 <sup>-4</sup>       | 3.81 x 10 <sup>-5</sup> | -0.40                                      | -0.48    | 1                                 | 0                                  |
| SPRY1       | sprouty RTK signaling antagonist 1                                      | 7.46 x 10 <sup>-5</sup>       | 7.62 x 10 <sup>-4</sup> | -0.41                                      | -0.40    | 1                                 | 0                                  |

| Gene Symbol | Gene Name                                 | <i>P</i> value (FDR-adjusted) |                         | <i>r</i> (partial correlation coefficient) |          | Present In*                       |                                    |
|-------------|-------------------------------------------|-------------------------------|-------------------------|--------------------------------------------|----------|-----------------------------------|------------------------------------|
|             |                                           | Cohort 1                      | Cohort 2                | Cohort 1                                   | Cohort 2 | Peters (2015) Study <sup>22</sup> | Digital Ageing Atlas <sup>23</sup> |
| STRBP       | spermatid perinuclear RNA binding protein | 7.96 x 10 <sup>-6</sup>       | 6.70 x 10 <sup>-5</sup> | -0.45                                      | -0.47    | 1                                 | 0                                  |
| TCL6        | T cell leukemia/lymphoma 6                | 2.70 x 10 <sup>-4</sup>       | 1.47 x 10 <sup>-3</sup> | -0.38                                      | -0.38    | 0                                 | 0                                  |
| TMEM156     | transmembrane protein 156                 | 3.98 x 10 <sup>-4</sup>       | 2.03 x 10 <sup>-3</sup> | -0.37                                      | -0.37    | 1                                 | 0                                  |
| TMEM204     | transmembrane protein 204                 | 4.95 x 10 <sup>-4</sup>       | 3.79 x 10 <sup>-4</sup> | -0.36                                      | -0.43    | 1                                 | 0                                  |
| TPD52       | tumor protein D52                         | 1.28 x 10 <sup>-4</sup>       | 1.40 x 10 <sup>-5</sup> | -0.40                                      | -0.51    | 0                                 | 1                                  |
| USP6NL      | USP6 N-terminal like                      | 2.34 x 10 <sup>-6</sup>       | 1.09 x 10 <sup>-3</sup> | -0.48                                      | -0.39    | 0                                 | 0                                  |
| VPREB3      | V-set pre-B cell surrogate light chain 3  | 3.19 x 10 <sup>-4</sup>       | 1.10 x 10 <sup>-4</sup> | -0.37                                      | -0.46    | 1                                 | 0                                  |
| ZCCHC7      | zinc finger CCHC-type containing 7        | 3.70 x 10 <sup>-4</sup>       | 2.52 x 10 <sup>-3</sup> | -0.37                                      | -0.37    | 1                                 | 0                                  |

\*1=present, 0=not present.
